# Supplementary material for: Site-selective sequential coupling reactions controlled by “Electrochemical Reaction Site Switching”: a straightforward approach to 1,4-bis(diaryl)buta-1,3-diynes
Source: Royal Society of Chemistry journal article supplement (doi:10.1039/c2ob26567b), 2012-01-01

Supplementary Information

---

Site-Selective Sequential Coupling Reactions Controlled by “Electrochemical Reaction Site Switching”: a Straightforward Approach to 1,4-Bis(diaryl)buta-1,3-diyne

*Koichi Mitsudo,\* Natsuyo Kamimoto, Hiroki Murakami, Hiroki Mandai, Atsushi Wakamiya, Yasujiro Murata, and Seiji Suga\**

---

**Table of Contents**

|                                                           |        |
|-----------------------------------------------------------|--------|
| 1. X-ray Crystallography                                  | S2     |
| 3. <sup>1</sup> H and <sup>13</sup> C Spectra of Products | S3–S28 |

## 1. X-ray Crystallography

Details of the crystal data and a summary of the intensity data collection parameters for bis(diaryl)butadiyne **3g** are listed in Table S1. X-ray single crystal analysis was conducted with a Rigaku VariMax with Saturn. Graphite-monochromated Mo K $\alpha$  radiation ( $\lambda = 0.71075 \text{ \AA}$ ) was used. The structures were solved by direct methods with (SHELXS-97)<sup>1</sup> and refined by full-matrix least-squares techniques against  $F^2$  (SHELXL-97). The non-hydrogen atoms were refined anisotropically. Hydrogen atoms were placed using AFIX instructions. In the subsequent refinement, the function  $\Sigma w(F_o^2 - F_c^2)^2$  was minimized, where  $|F_o|$  and  $|F_c|$  are the observed and calculated structure factor amplitudes, respectively. The agreement indices are defined as  $R_1 = \Sigma(|F_o| - |F_c|) / \Sigma |F_o|$  and  $wR_2 = [\Sigma w(F_o^2 - F_c^2)^2 / \Sigma (wF_o^4)]^{1/2}$ . All calculations were performed by using Yadokari-XG 2009<sup>2</sup> and illustrations were drawn by using ORTEP-3.

**Table S1.** Crystallographic data and structure refinement details for **3g**.

|                                 |                                                |                                |
|---------------------------------|------------------------------------------------|--------------------------------|
| Empirical formula               | C <sub>32</sub> H <sub>22</sub> O <sub>2</sub> |                                |
| Formula weight                  | 438.50                                         |                                |
| Temperature                     | 93(2) K                                        |                                |
| Wavelength                      | 0.71075 Å                                      |                                |
| Crystal system                  | Triclinic                                      |                                |
| Space group                     | P-1 (#2)                                       |                                |
| Unit cell dimensions            | $a = 9.271(7) \text{ \AA}$                     | $\alpha = 90.570(11)^\circ$ .  |
|                                 | $b = 9.707(7) \text{ \AA}$                     | $\beta = 97.203(5)^\circ$ .    |
|                                 | $c = 20.928(14) \text{ \AA}$                   | $\gamma = 114.198(13)^\circ$ . |
| Volume                          | 1700(2) Å <sup>3</sup>                         |                                |
| Z                               | 3                                              |                                |
| Density (calculated)            | 1.285 Mg/m <sup>3</sup>                        |                                |
| Absorption coefficient          | 0.079 mm <sup>-1</sup>                         |                                |
| F(000)                          | 690                                            |                                |
| Crystal size                    | 0.68 × 0.20 × 0.05 mm <sup>3</sup>             |                                |
| Theta range for data collection | 3.12 to 27.47°                                 |                                |
| Index ranges                    | -12 ≤ h ≤ 12, -12 ≤ k ≤ 12, -27 ≤ l ≤ 27       |                                |
| Reflections collected           | 20748                                          |                                |
| Independent reflections         | 7713 [R(int) = 0.0871]                         |                                |
| Completeness to theta = 27.47°  | 99.1%                                          |                                |
| Max. and min. transmission      | 0.9961 and 0.9484                              |                                |
| Refinement method               | Full-matrix least-squares on $F^2$             |                                |
| Data / restraints / parameters  | 7713 / 71 / 483                                |                                |
| Goodness-of-fit on $F^2$        | 0.912                                          |                                |
| Final R indices [I > 2σ(I)]     | $R_1 = 0.0581$ , $wR_2 = 0.1153$               |                                |
| R indices (all data)            | $R_1 = 0.1239$ , $wR_2 = 0.1405$               |                                |

(1) SHELX, Program for the Solution of Crystal Structures (a) Sheldrick, G. M.; University of Göttingen: Göttingen, Germany, 1997. (b) Sheldrick, G.M. *Acta Cryst.* **2008**, *A64*, 112–122.

(2) Yadokari-XG, Software for Crystal Structure Analyses, K. Wakita (2001); Release of Software (Yadokari-XG 2009) for Crystal Structure Analyses, Kabuto, C.; Akine, S.; Nemoto, T.; Kwon, E. *J. Cryst. Soc. Jpn.* **2009**, *51*, 218–224.

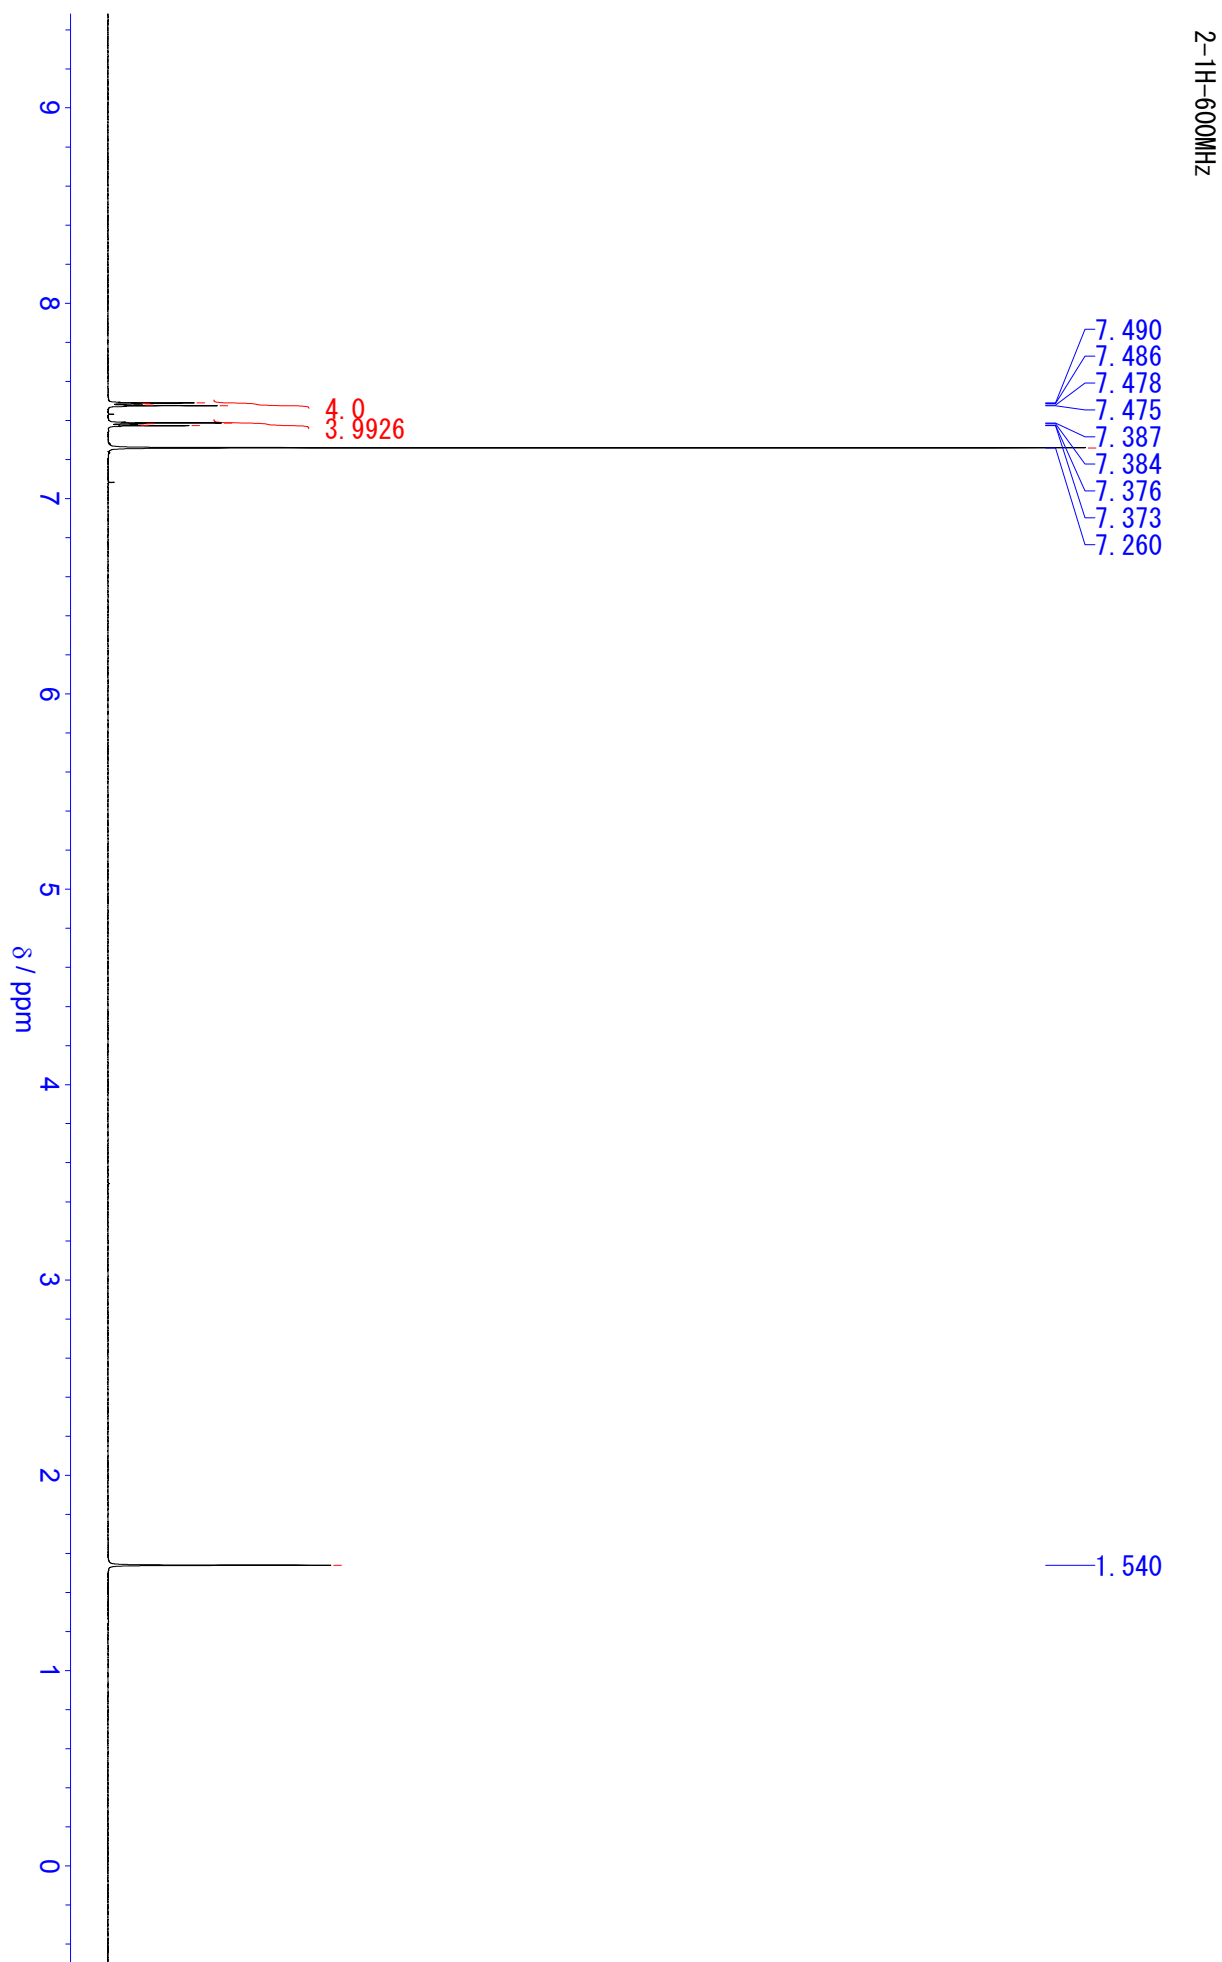

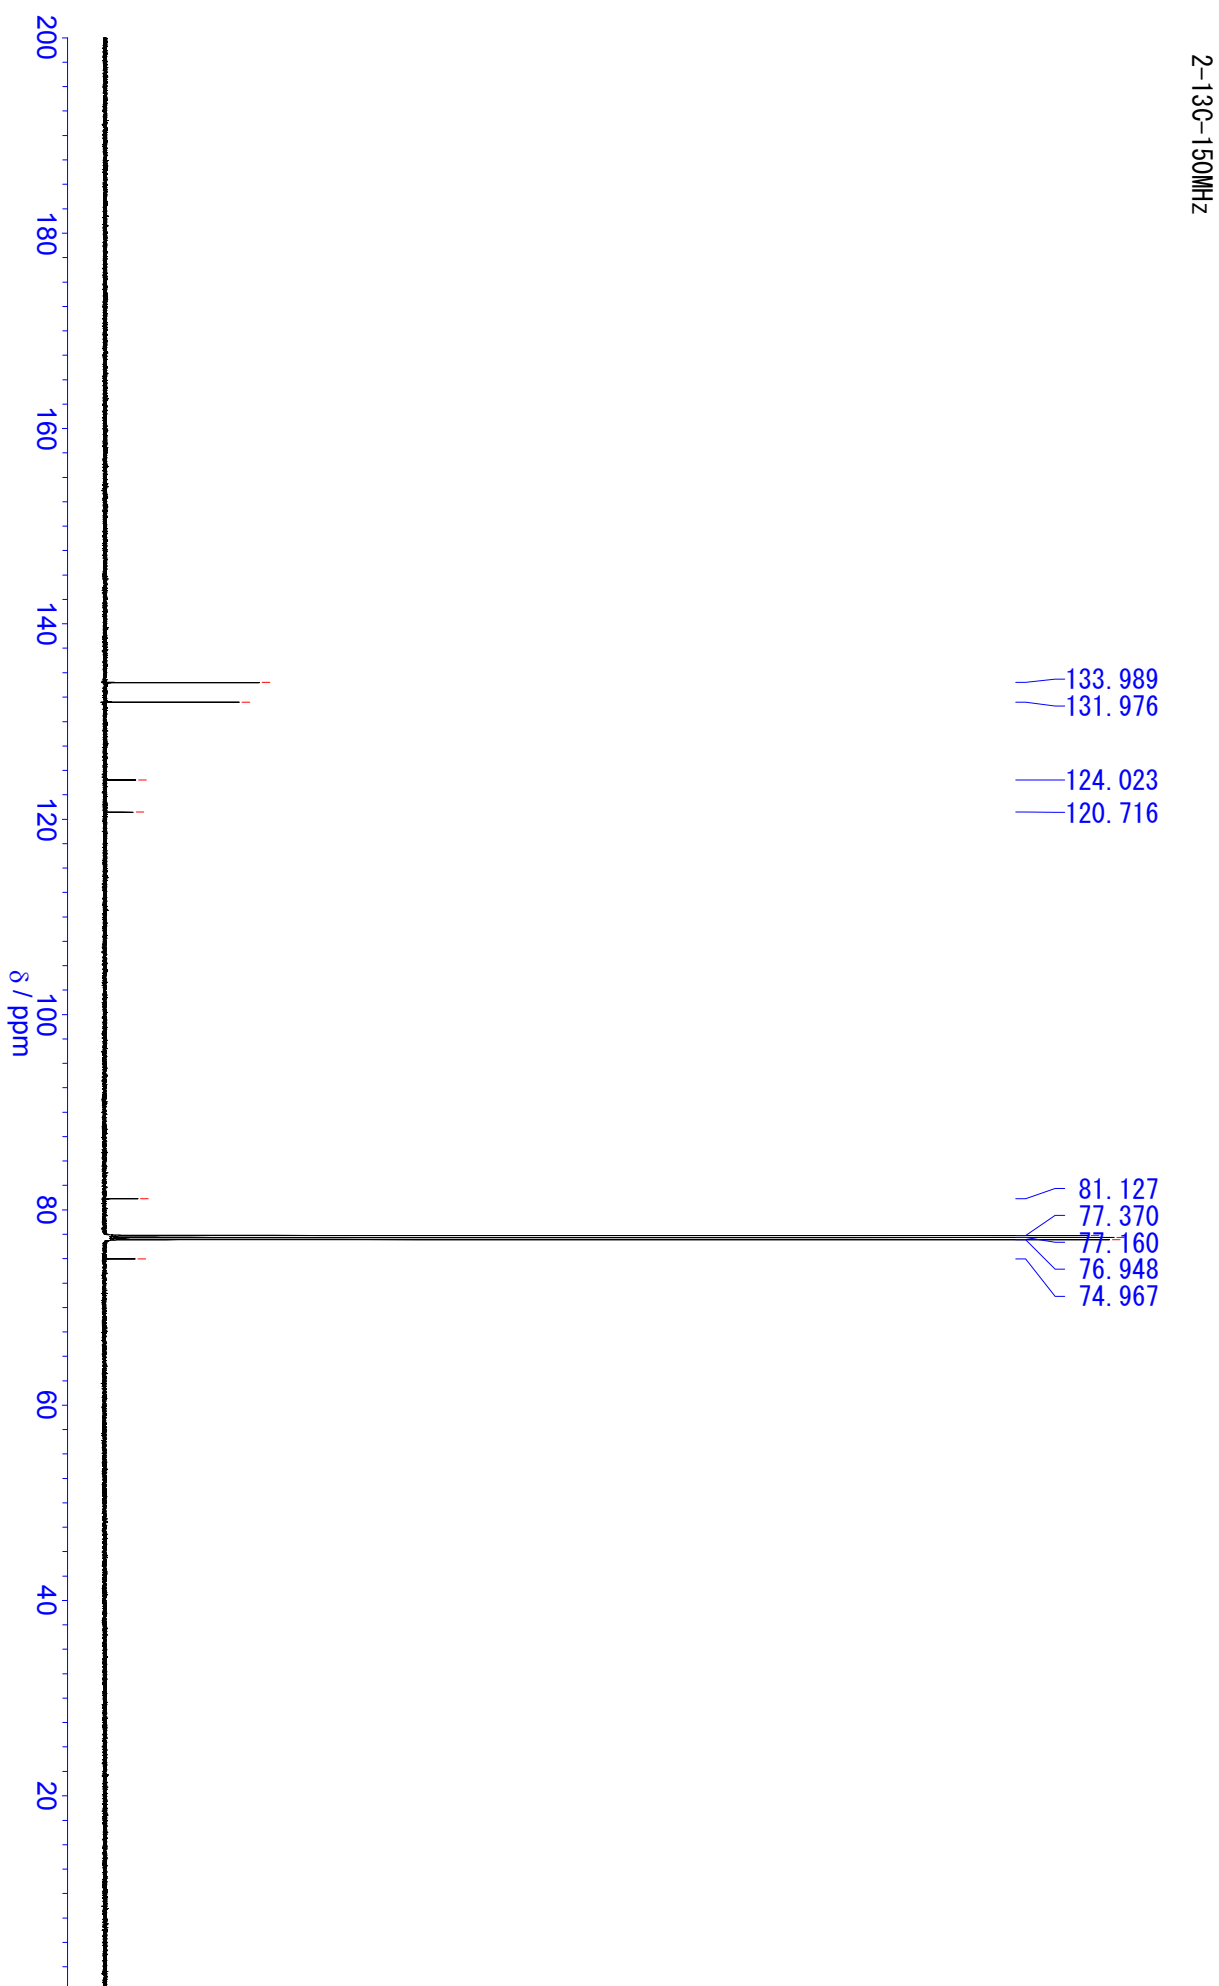

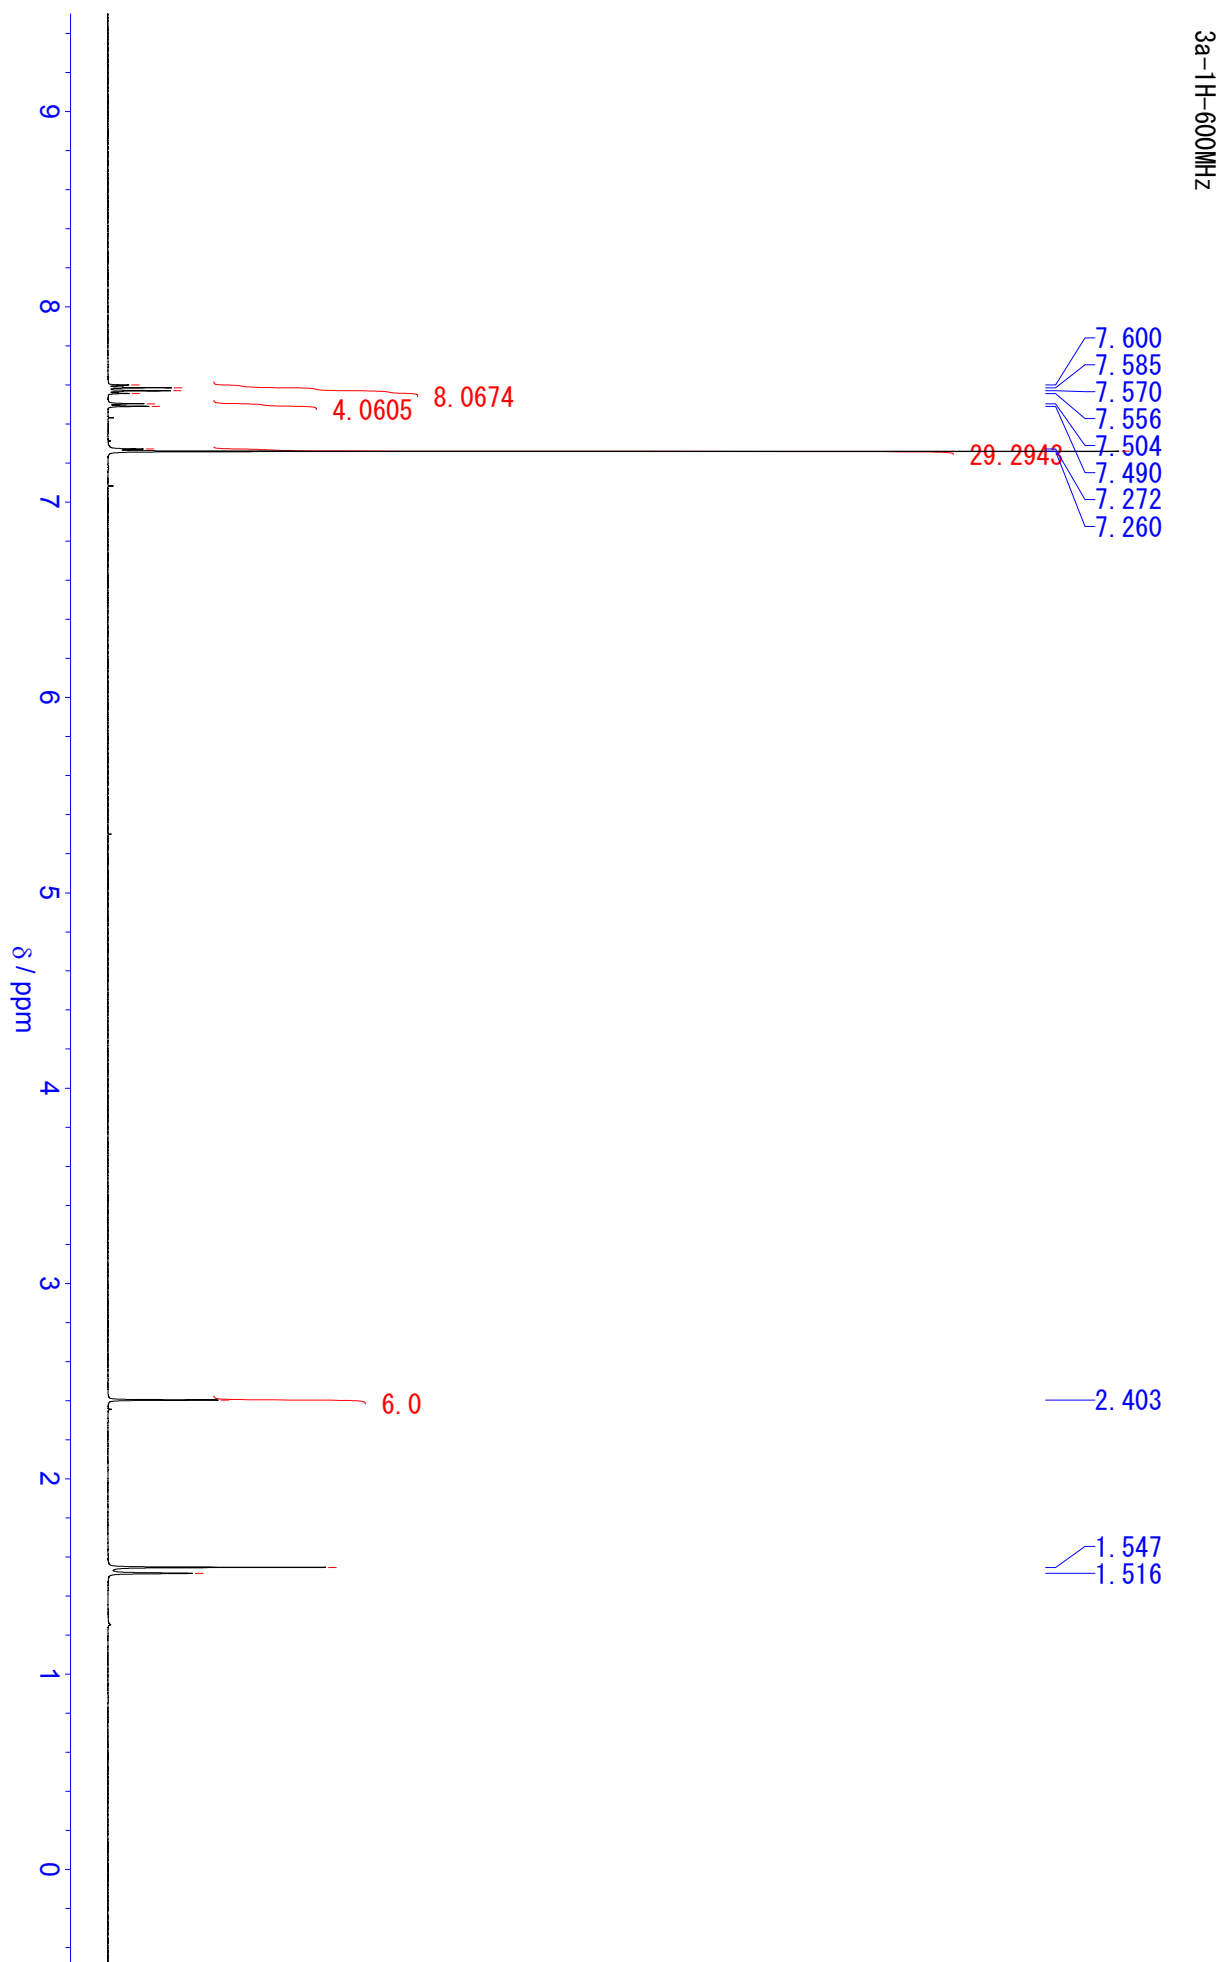

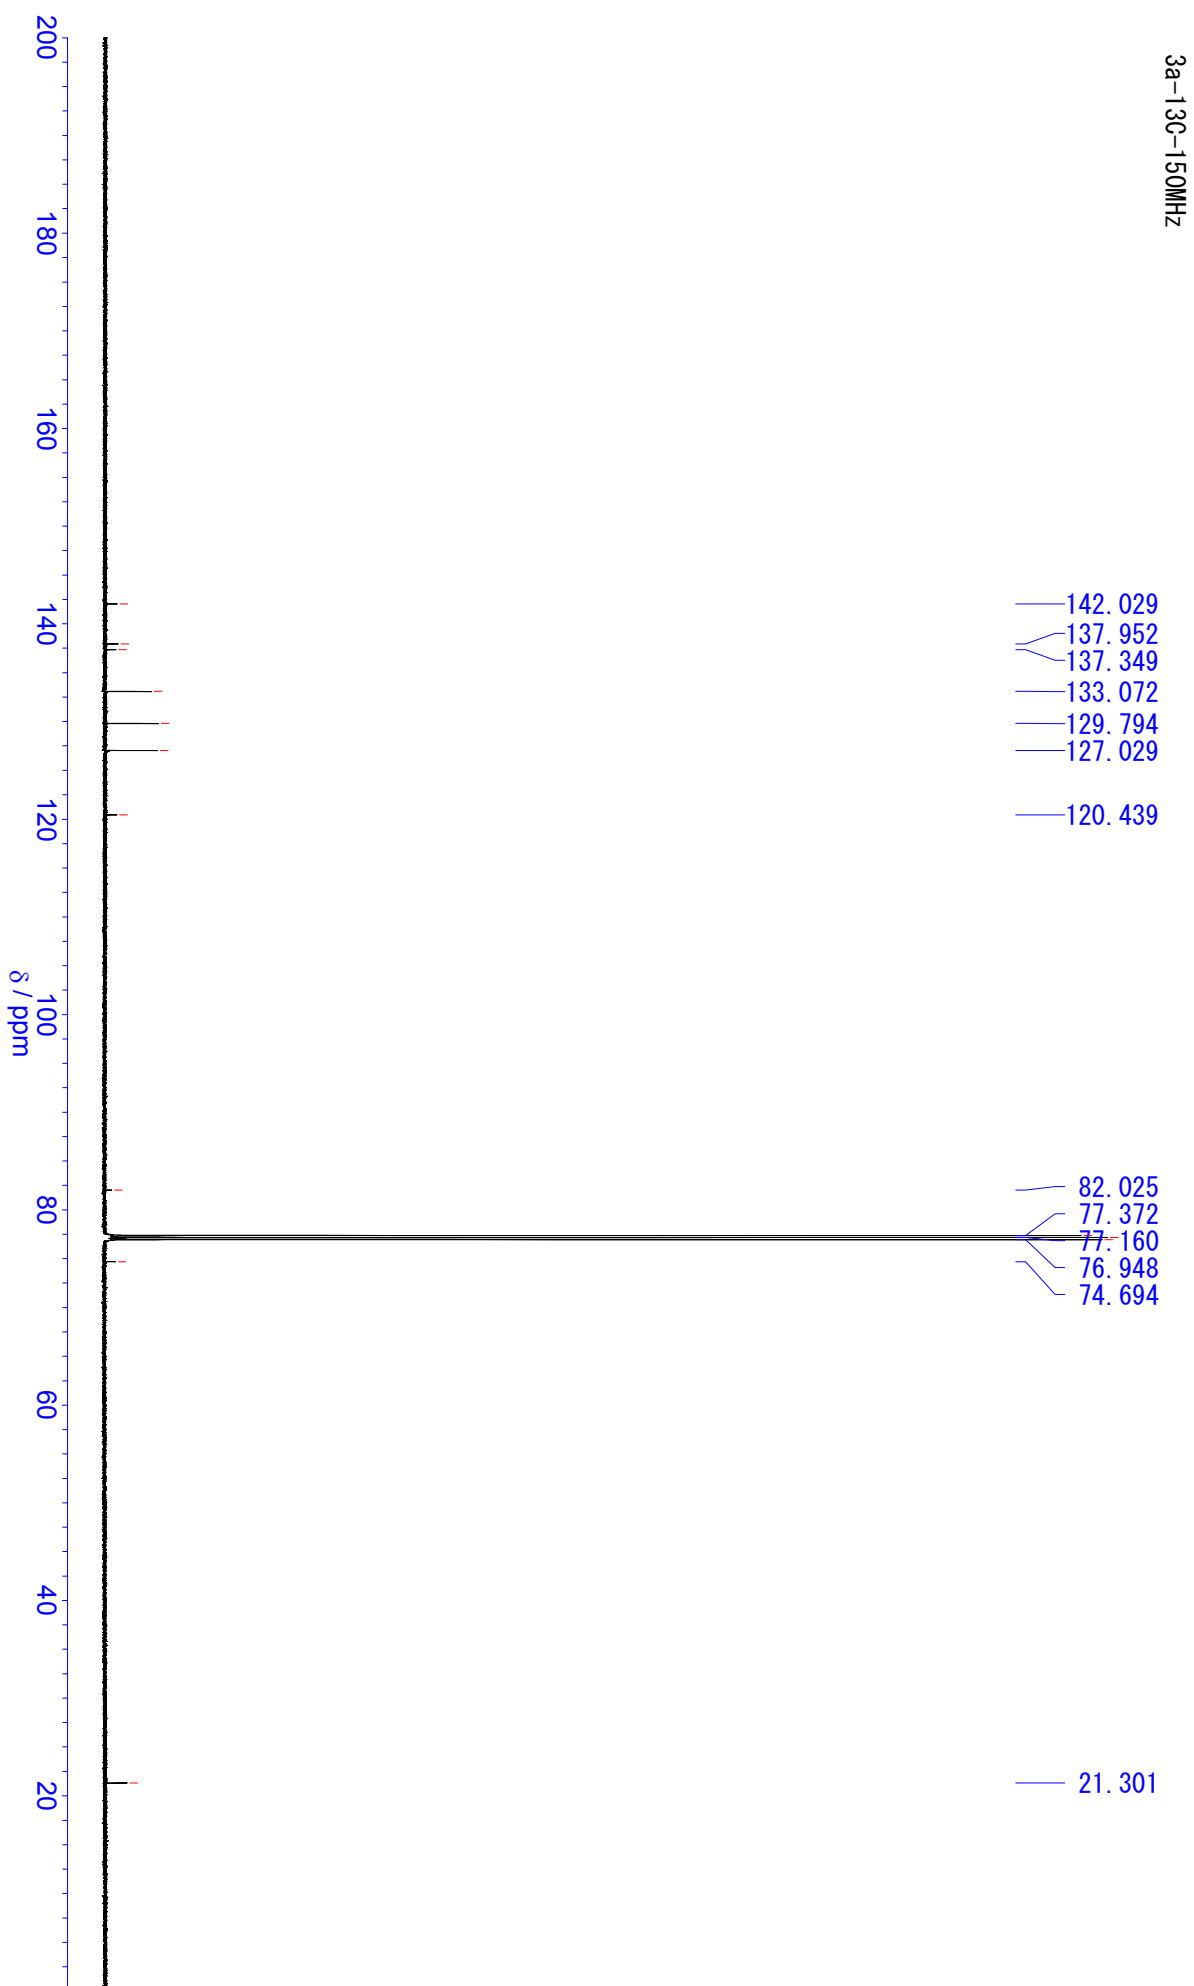

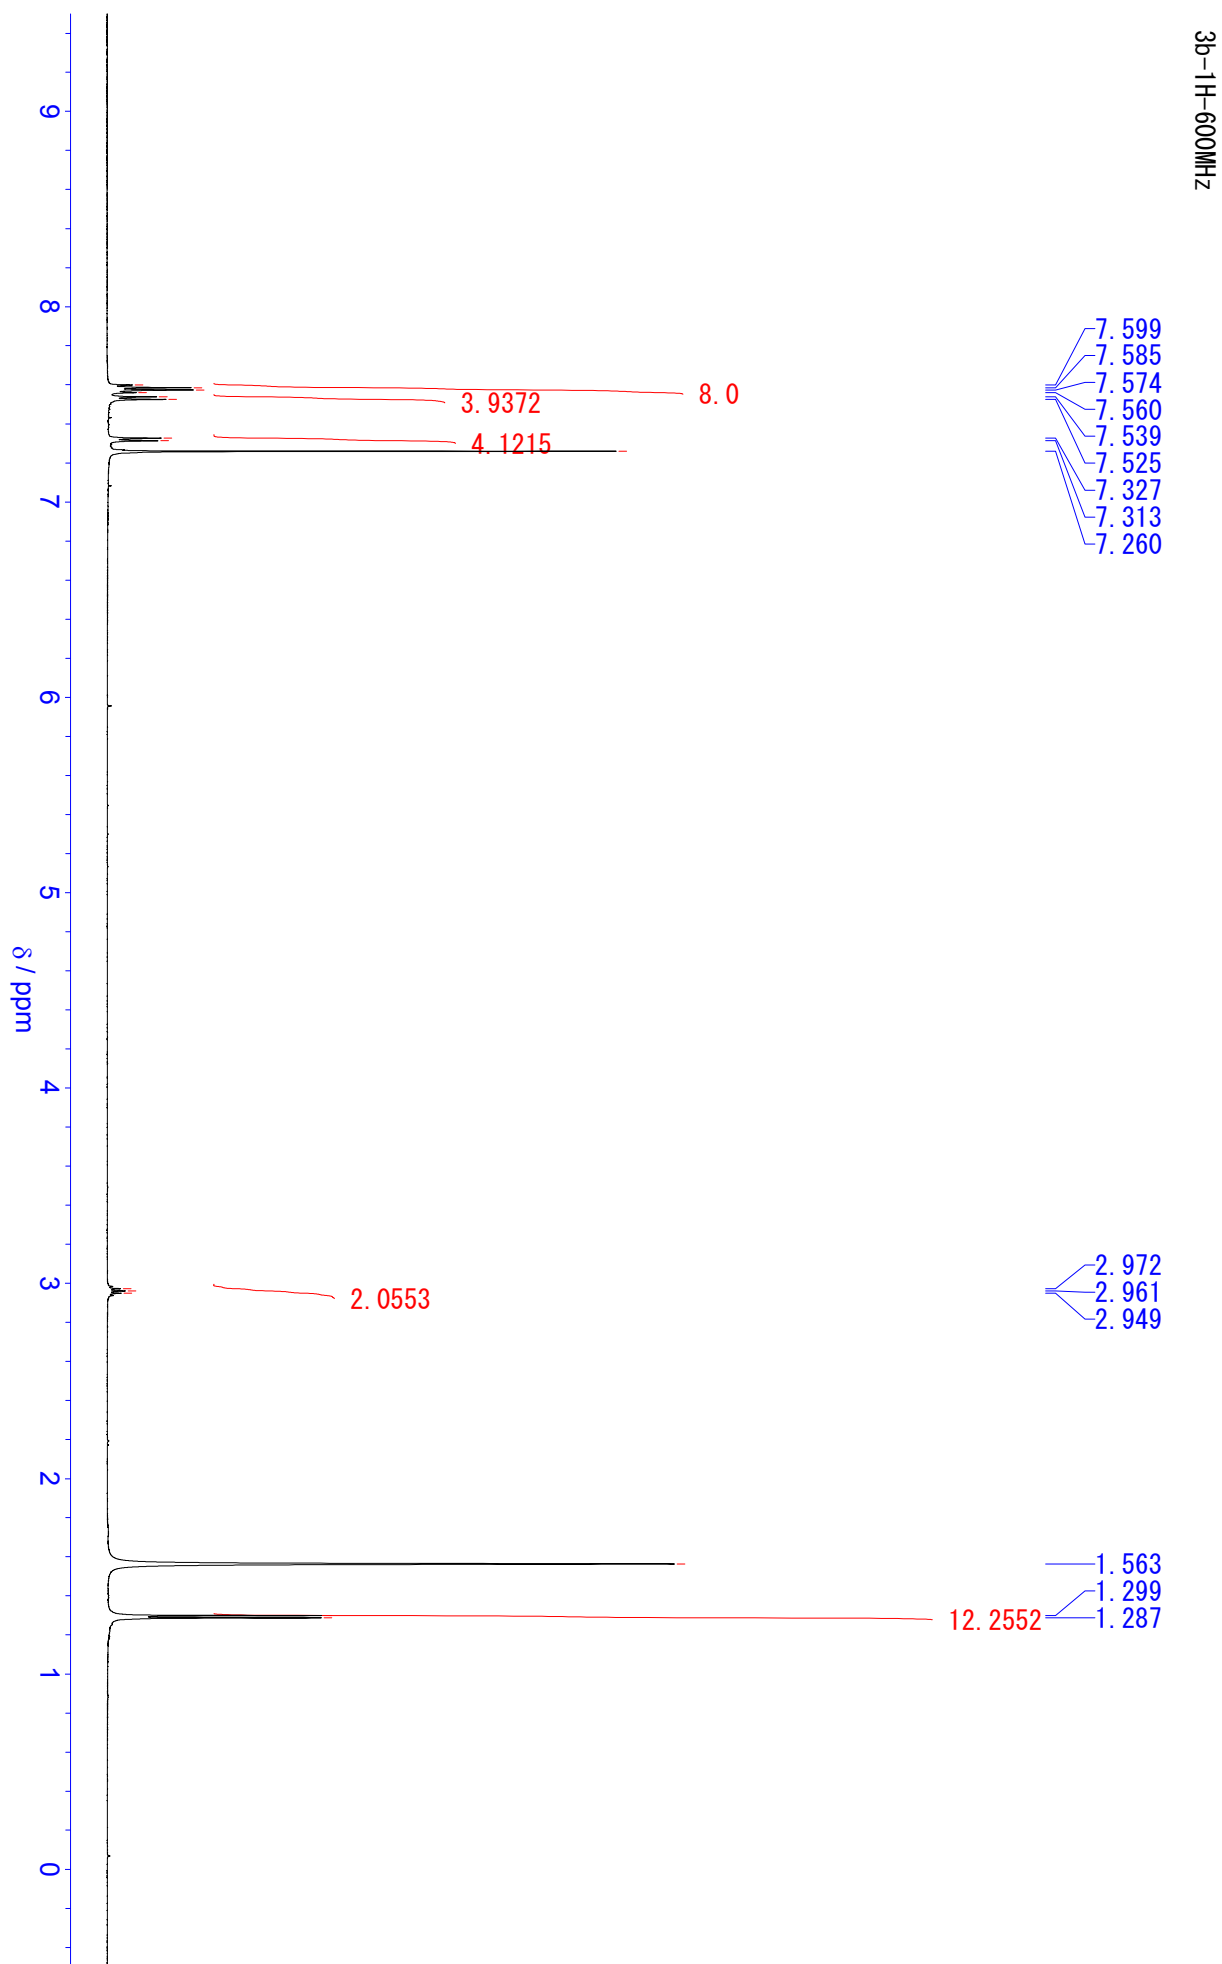

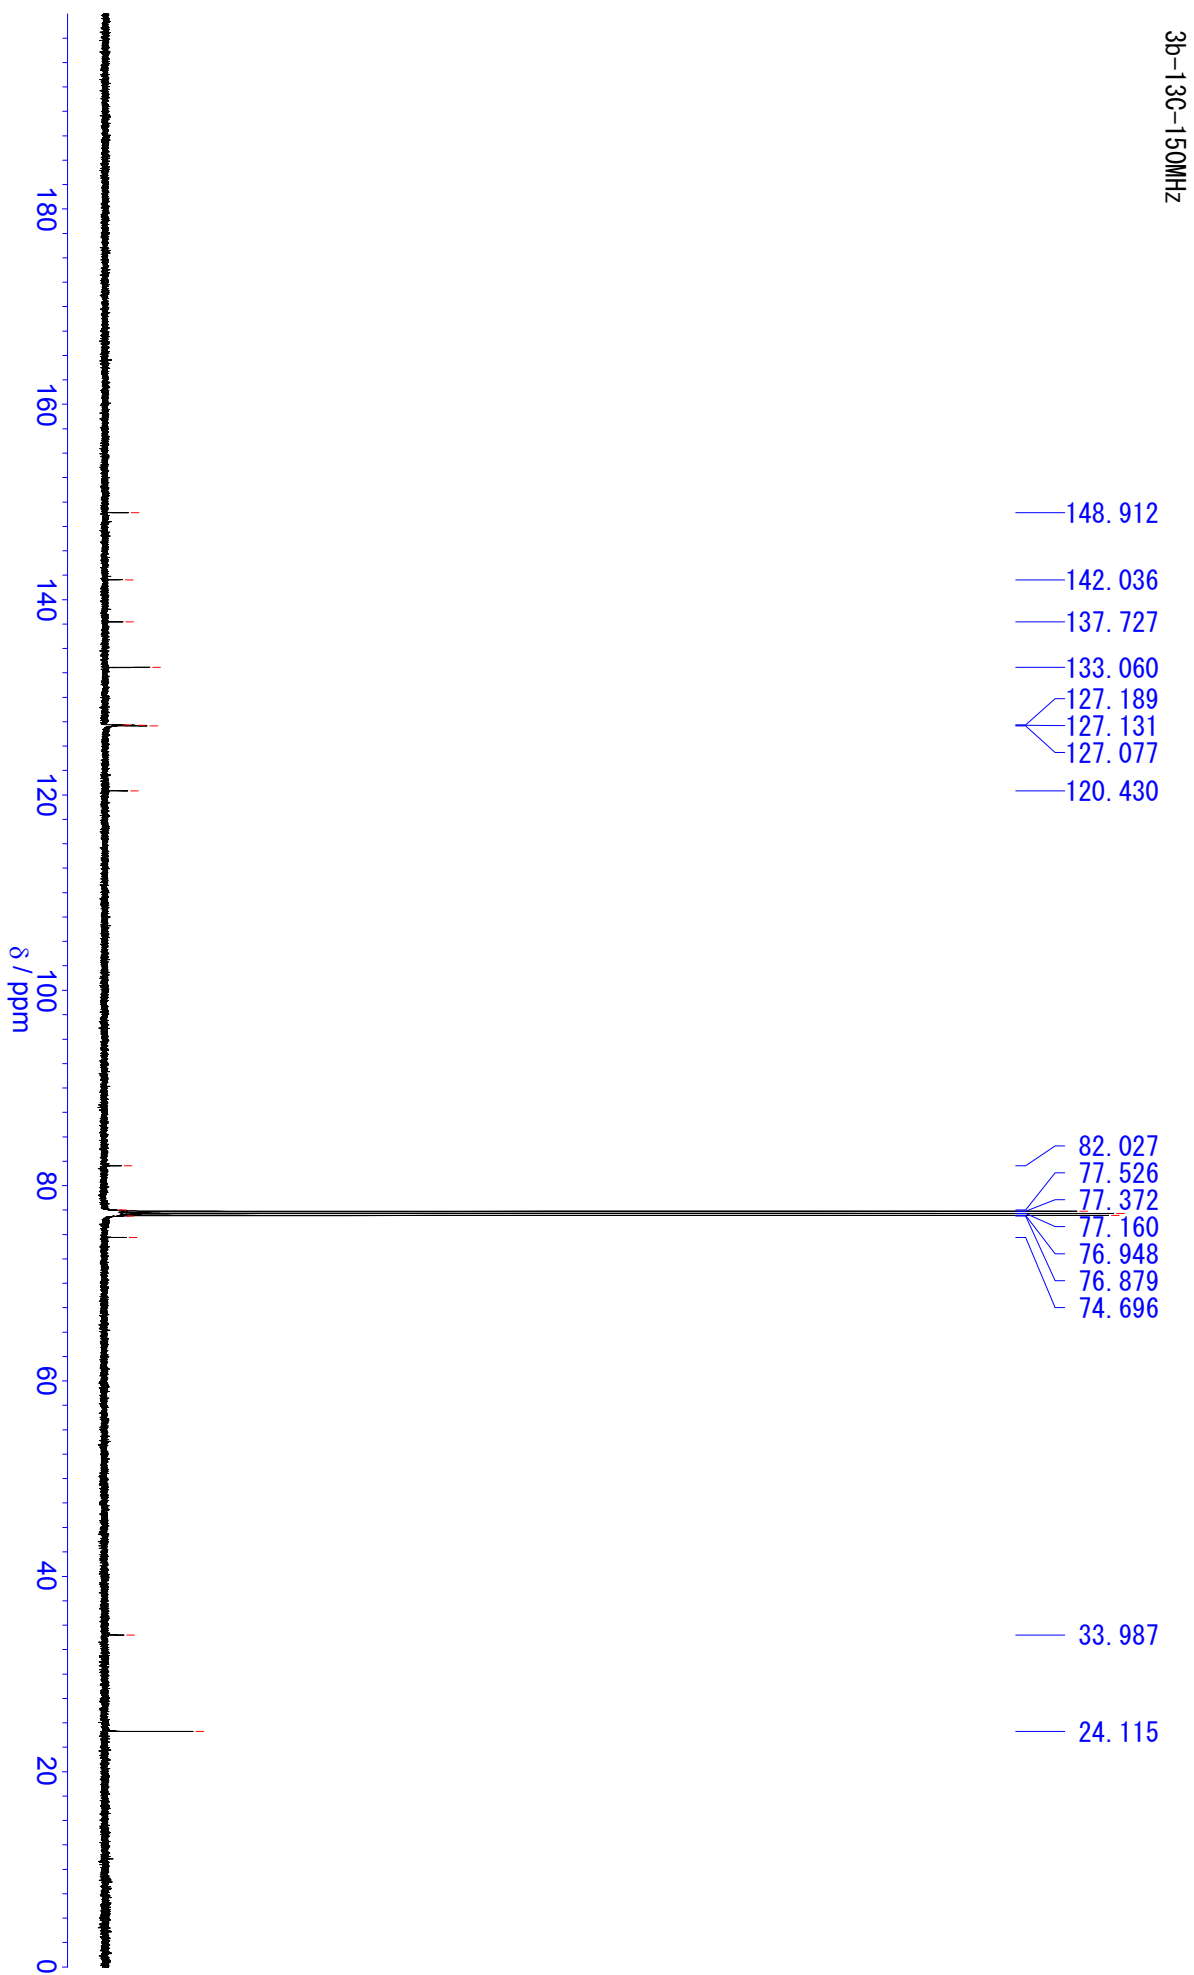



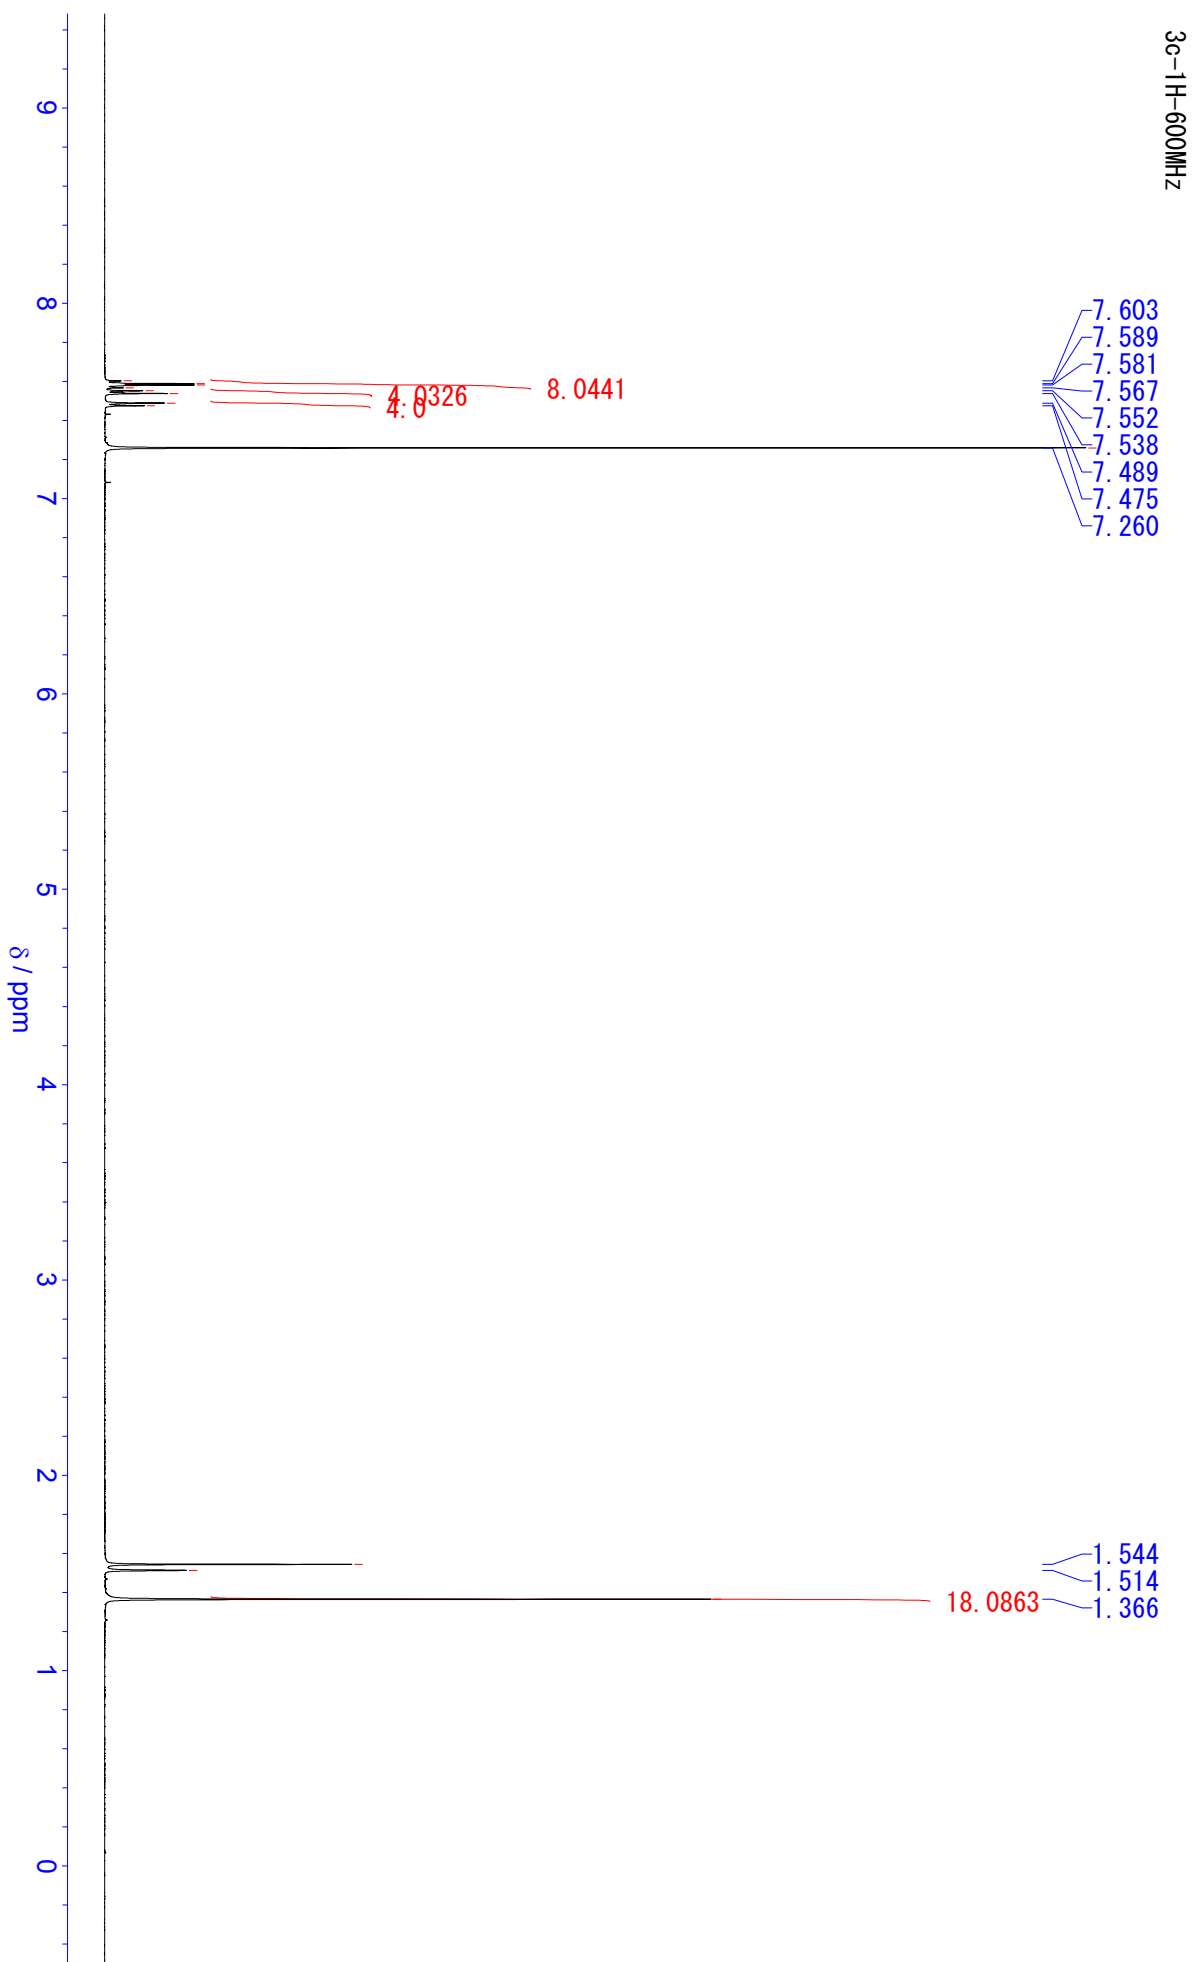

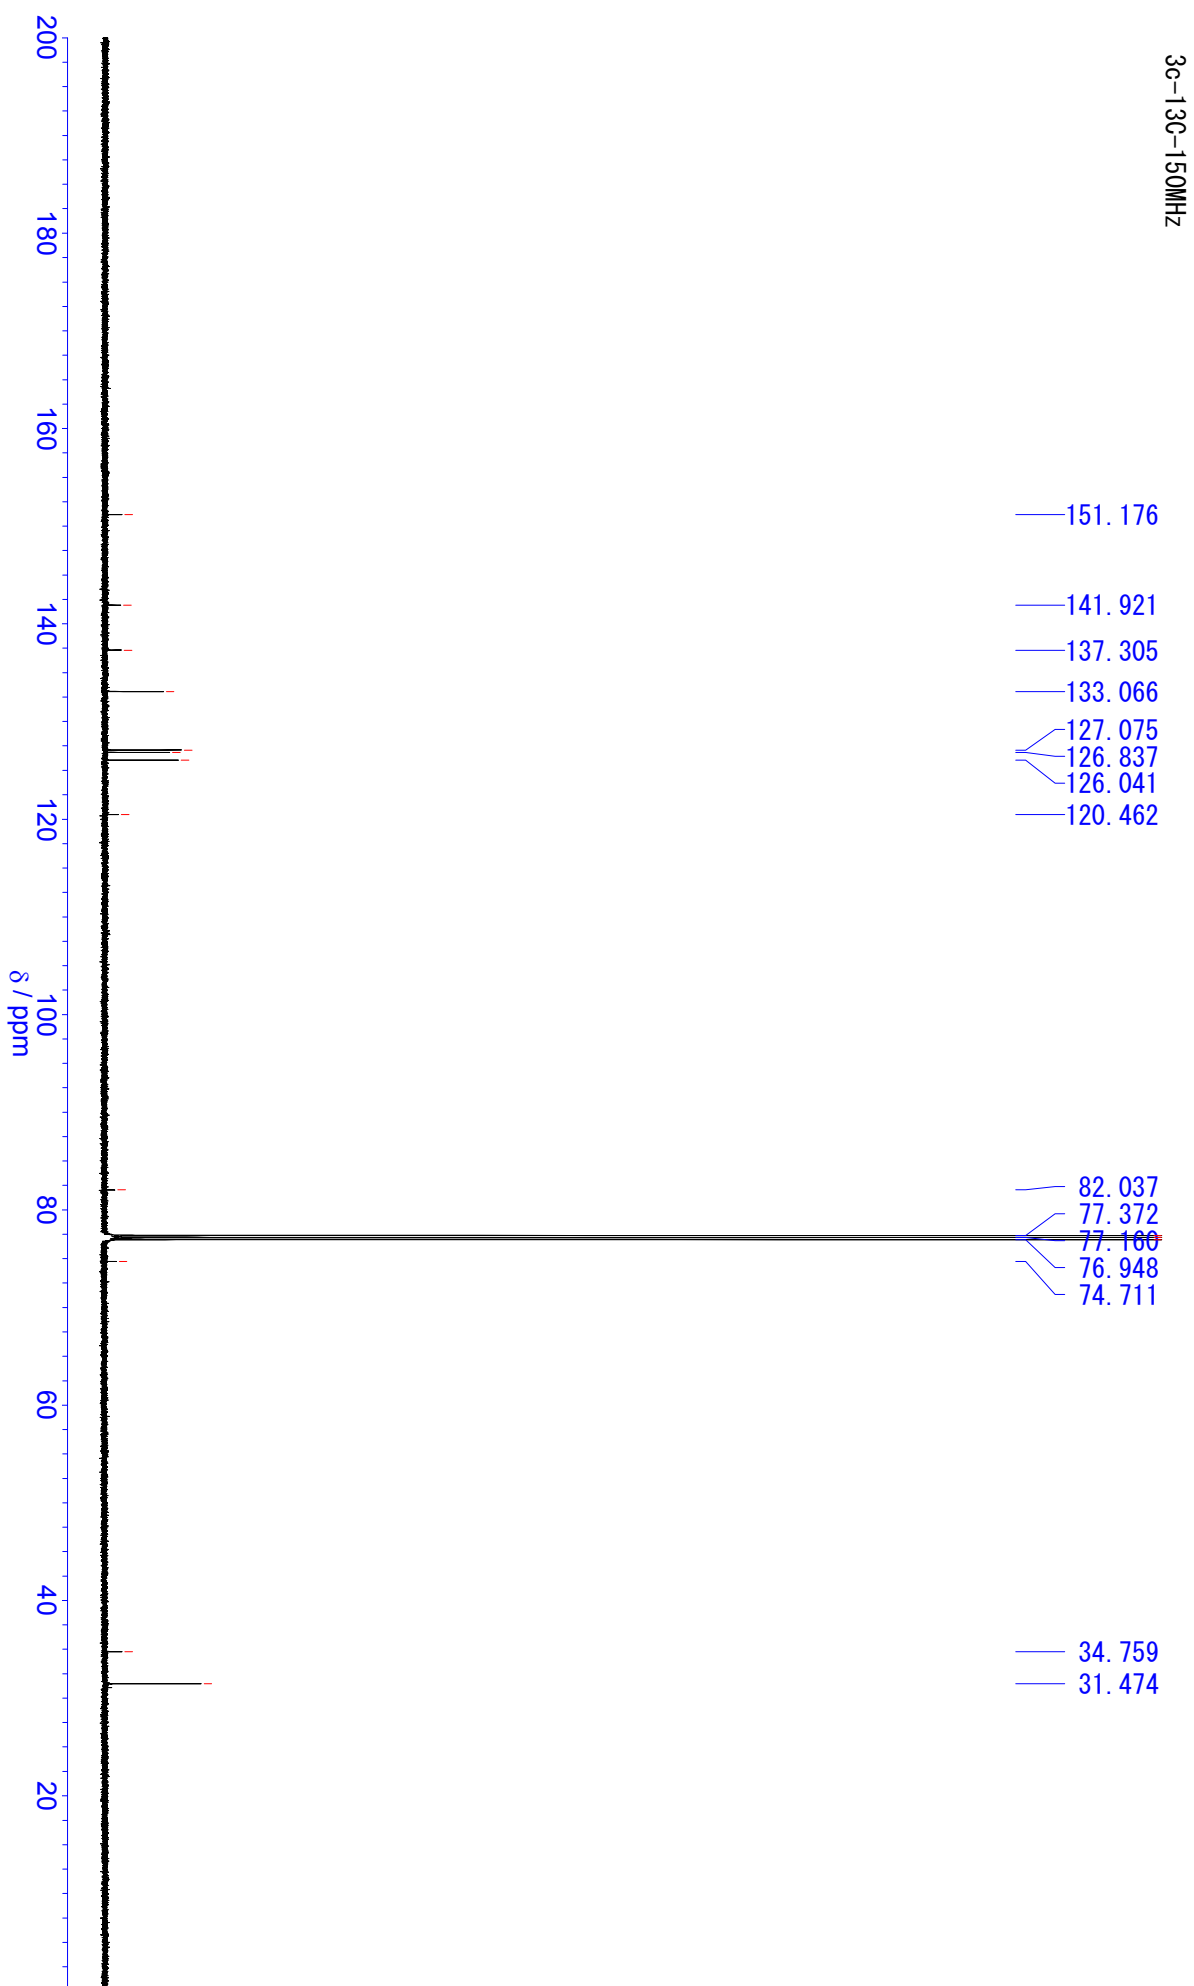

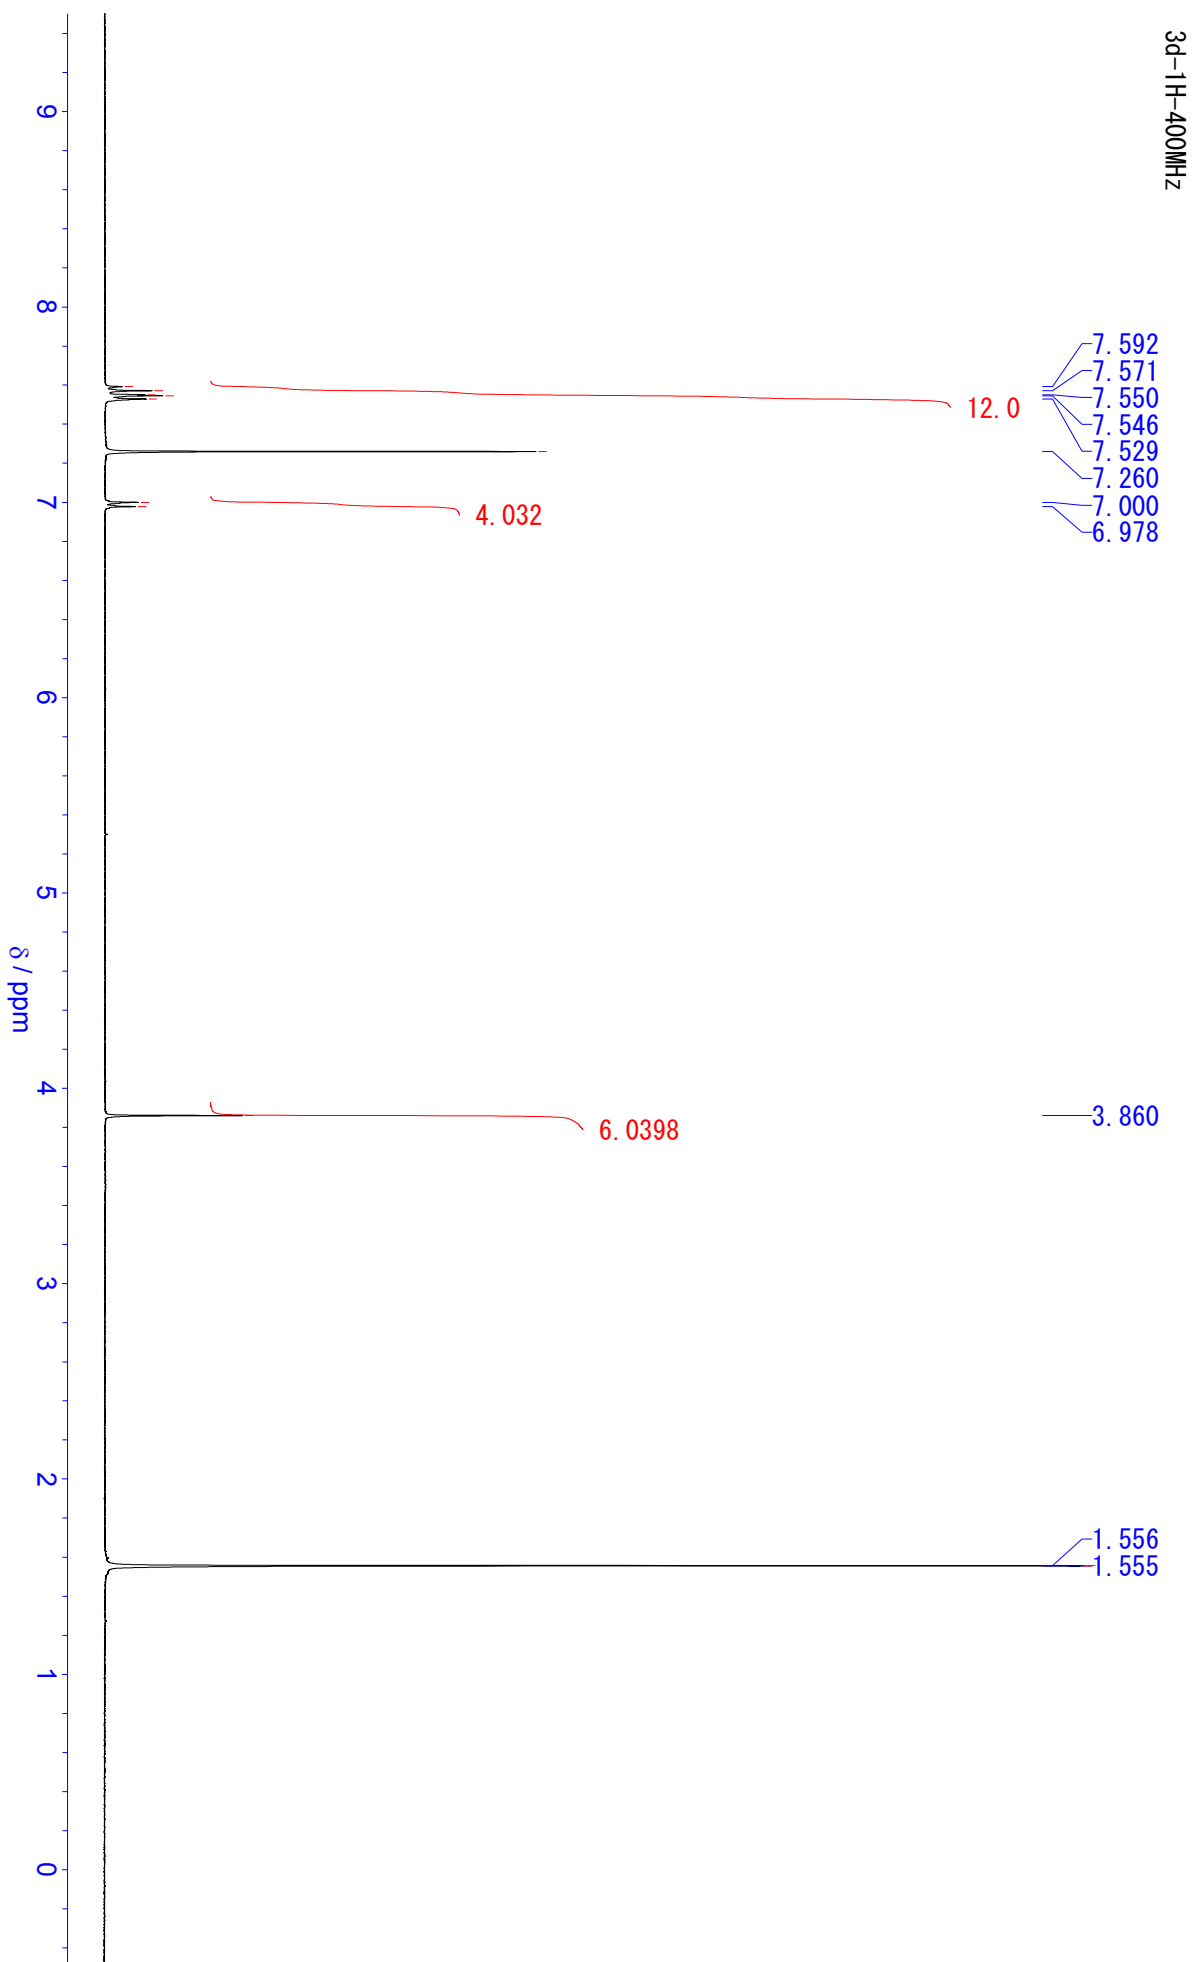

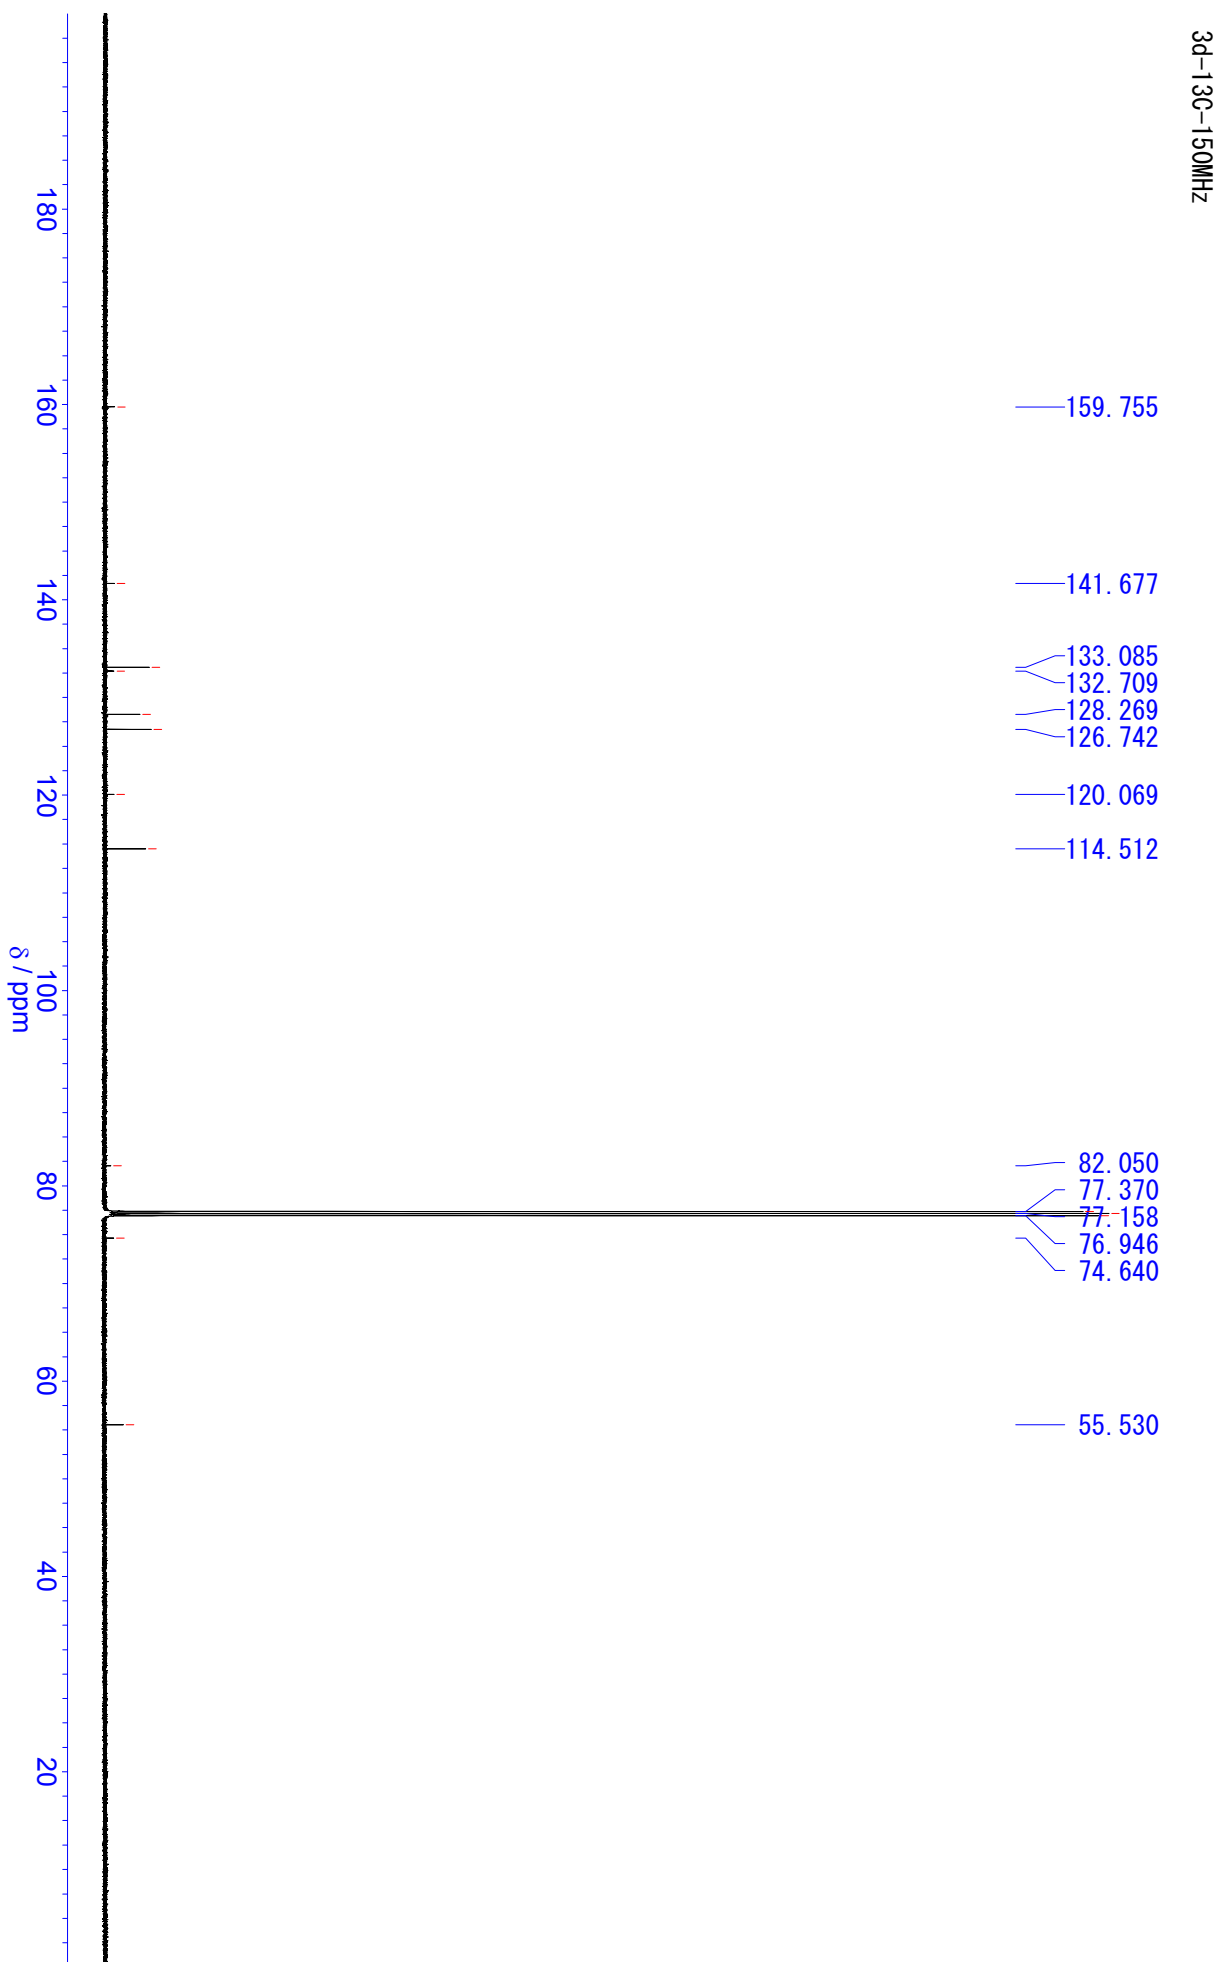

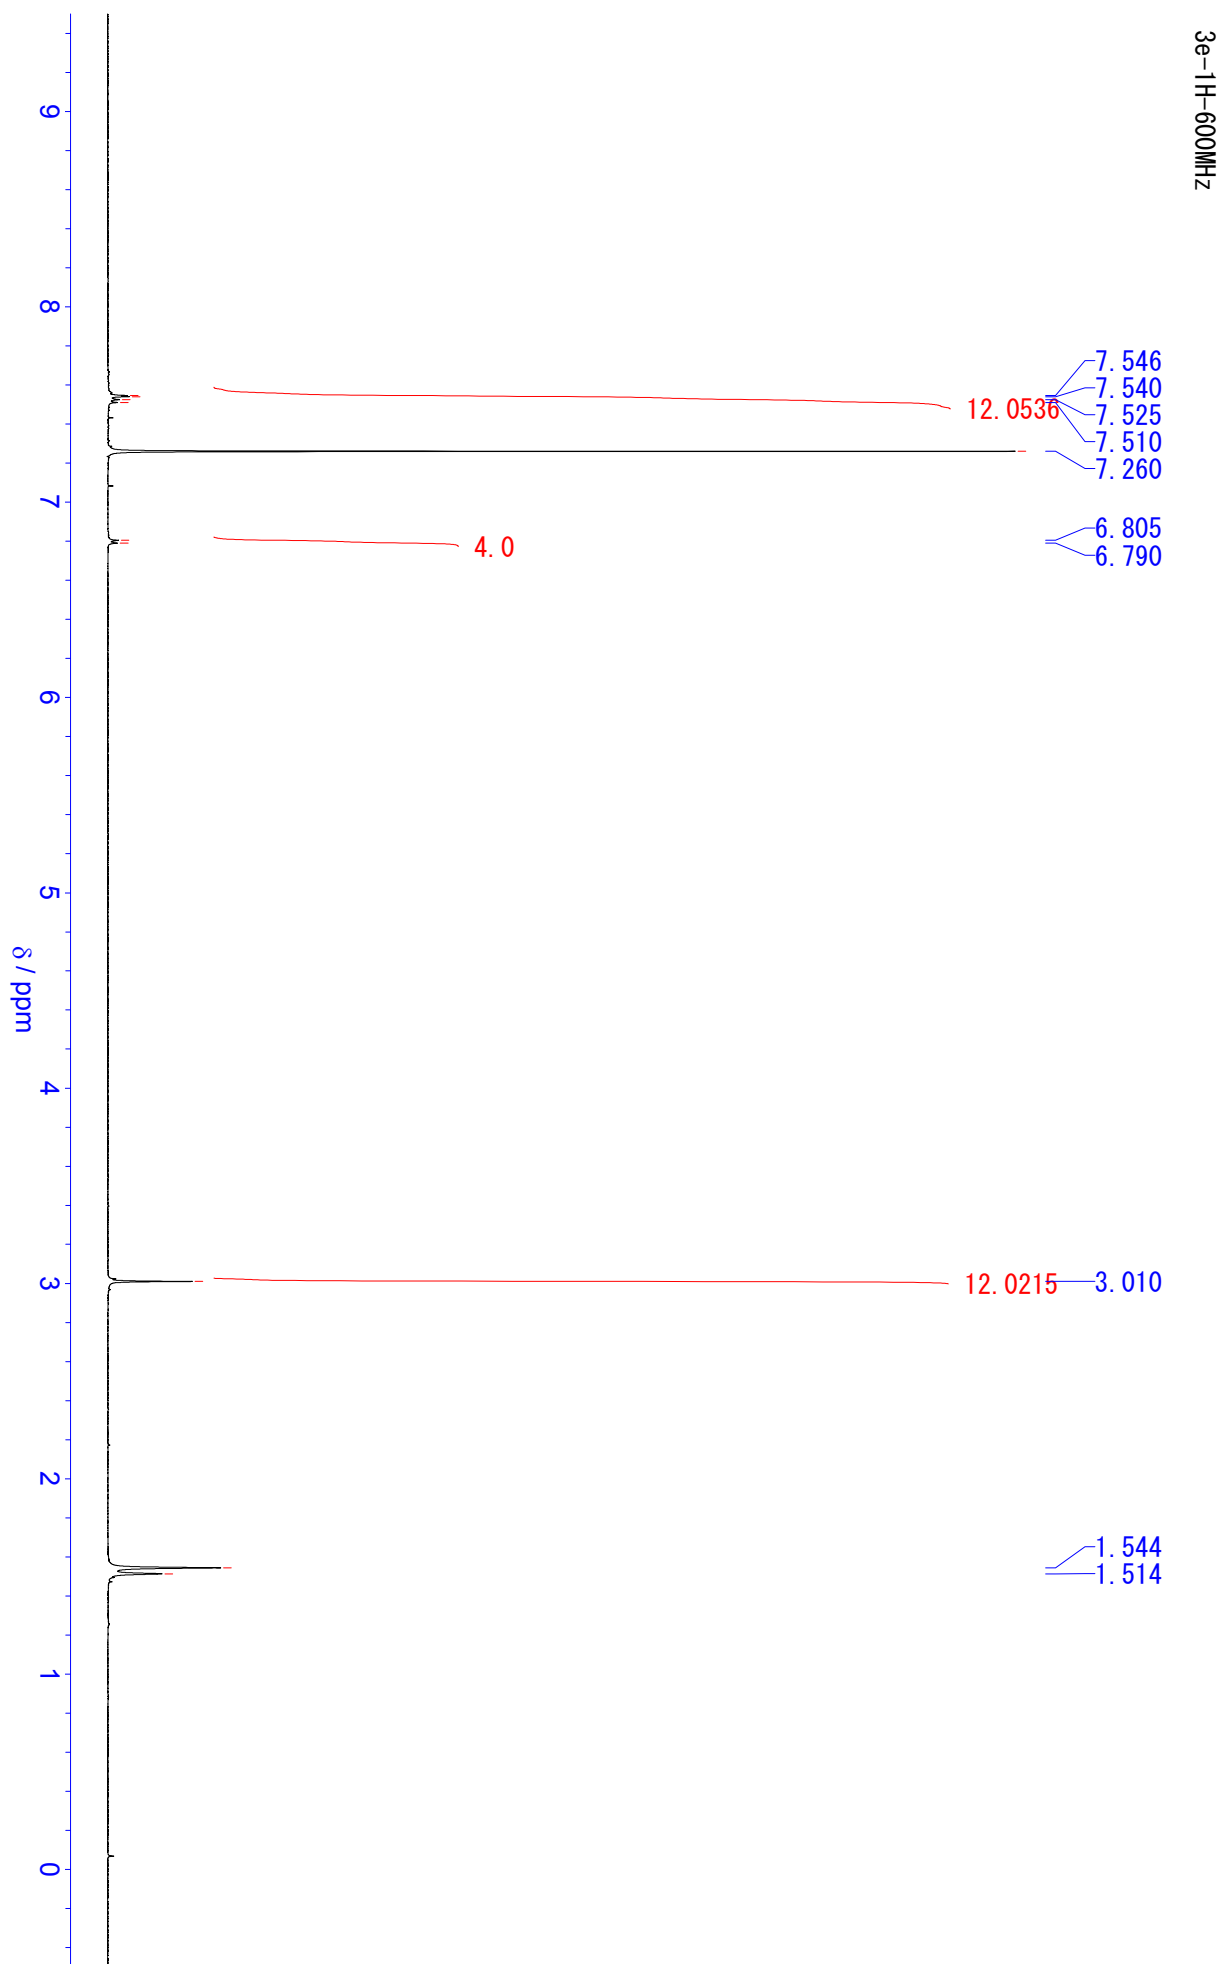

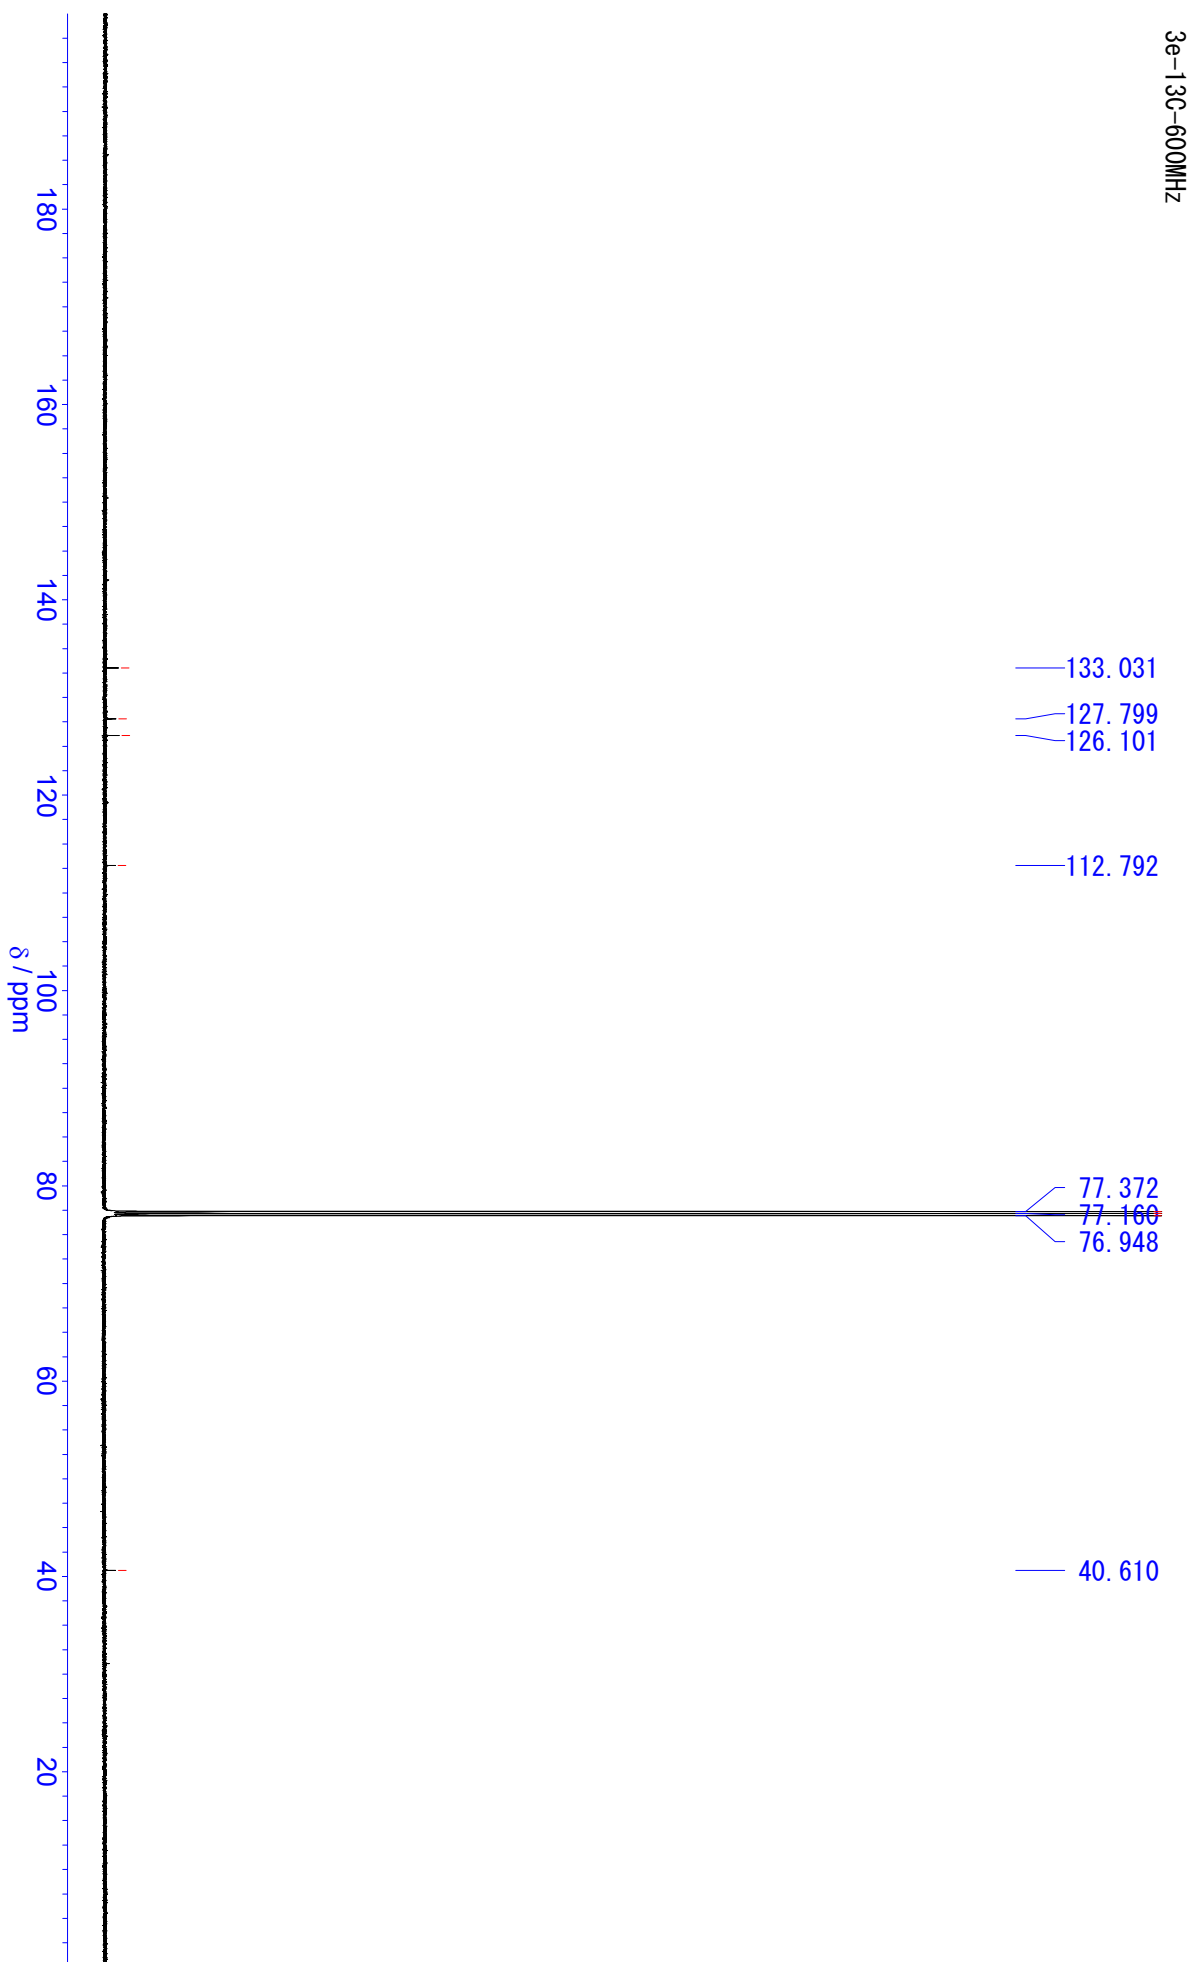

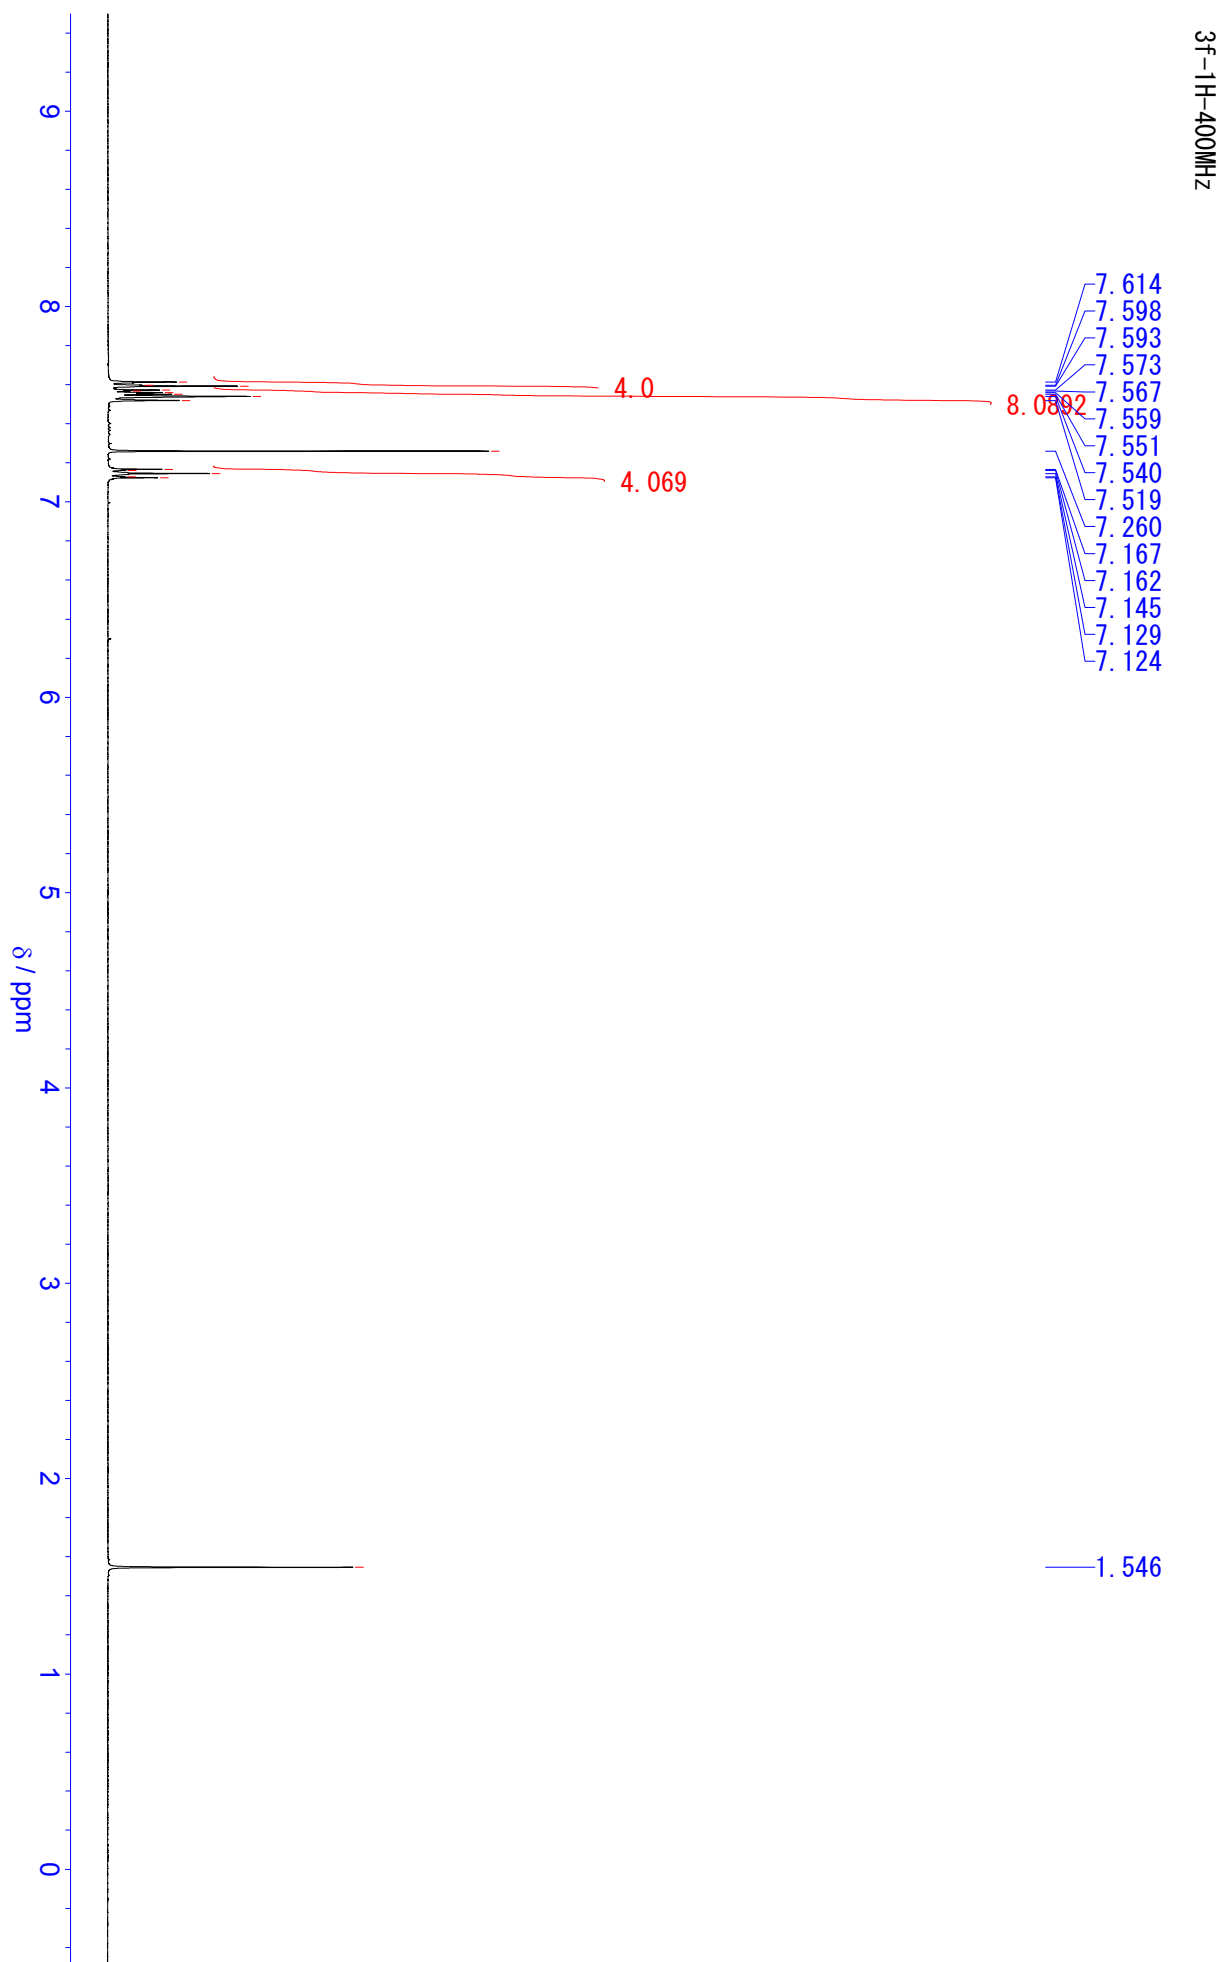

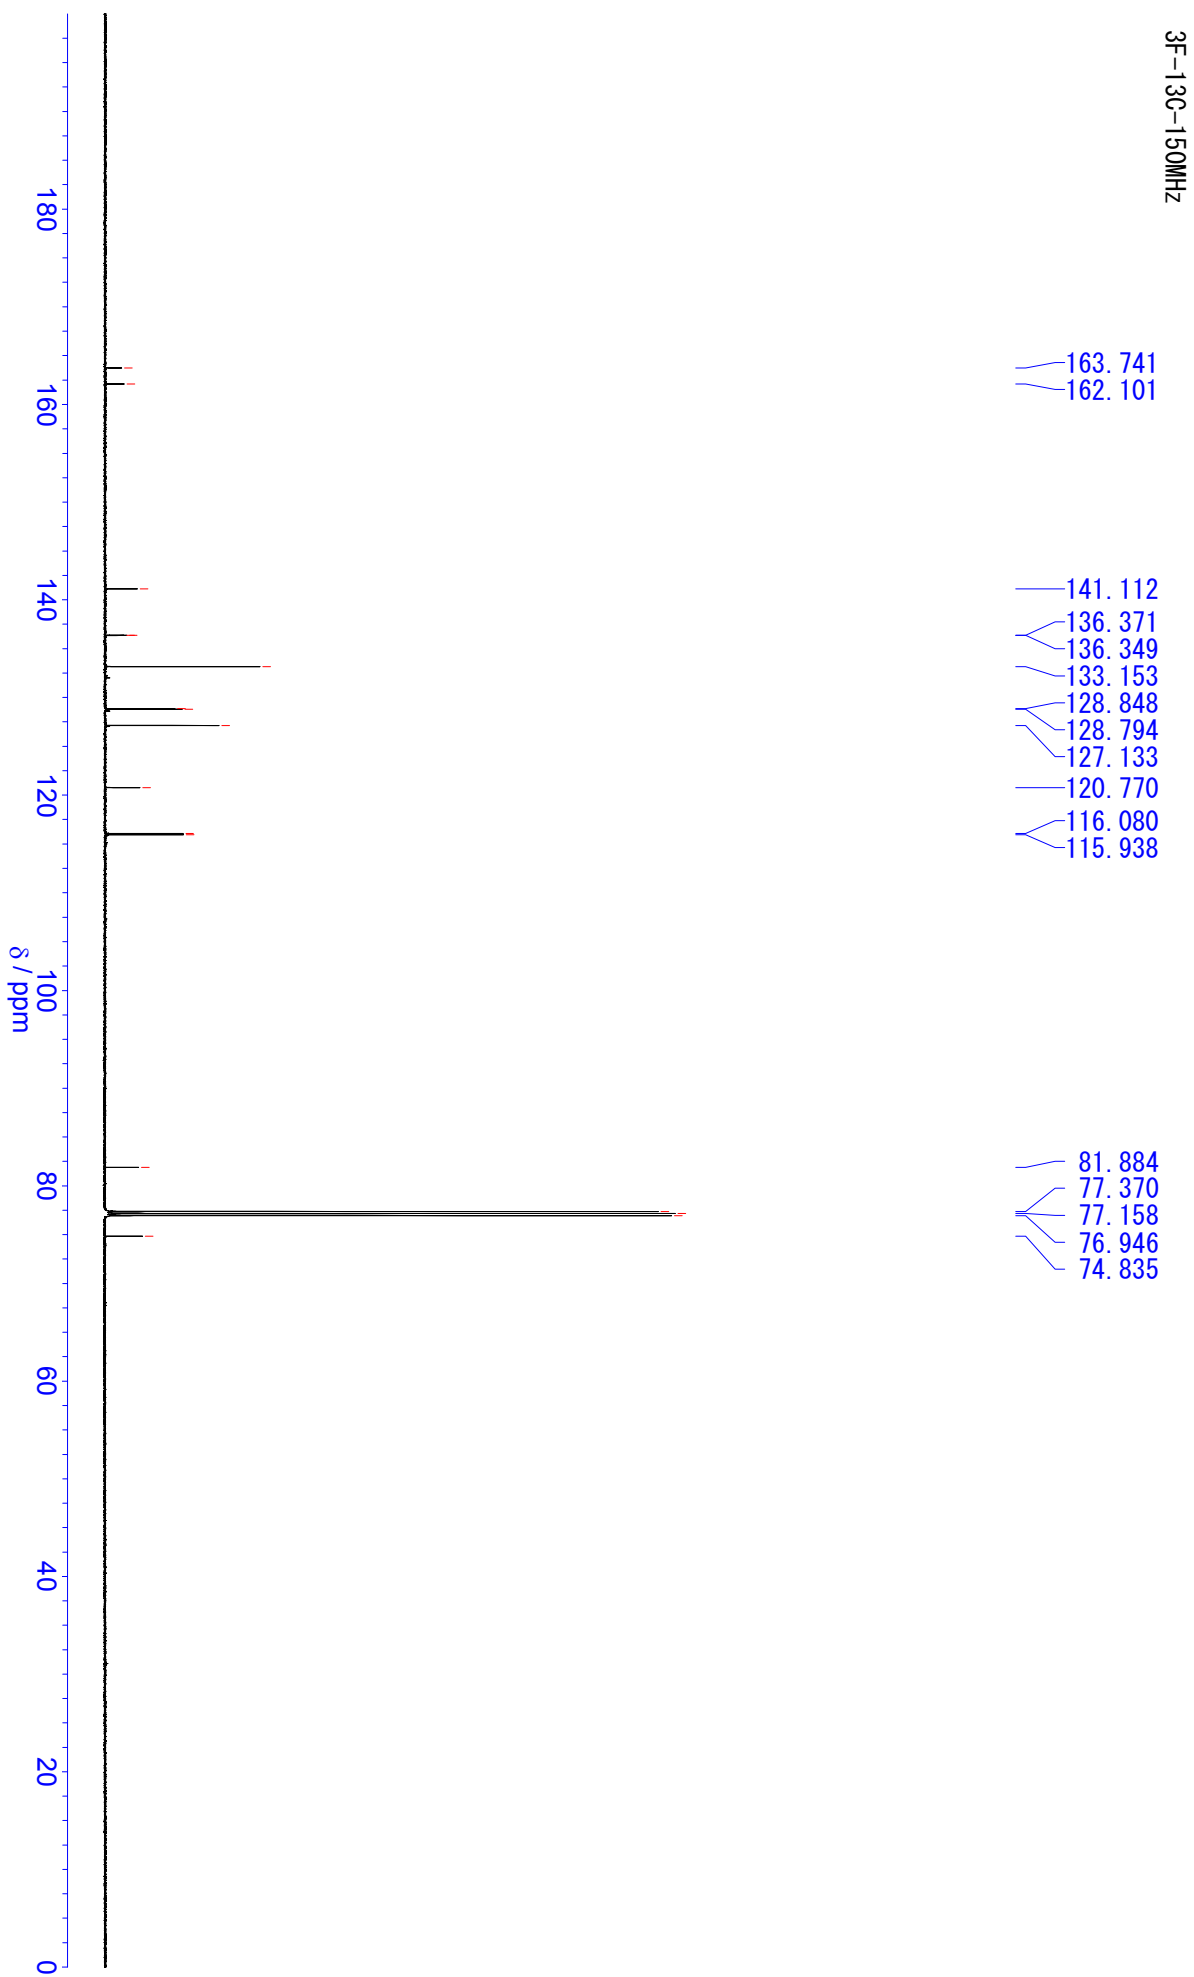



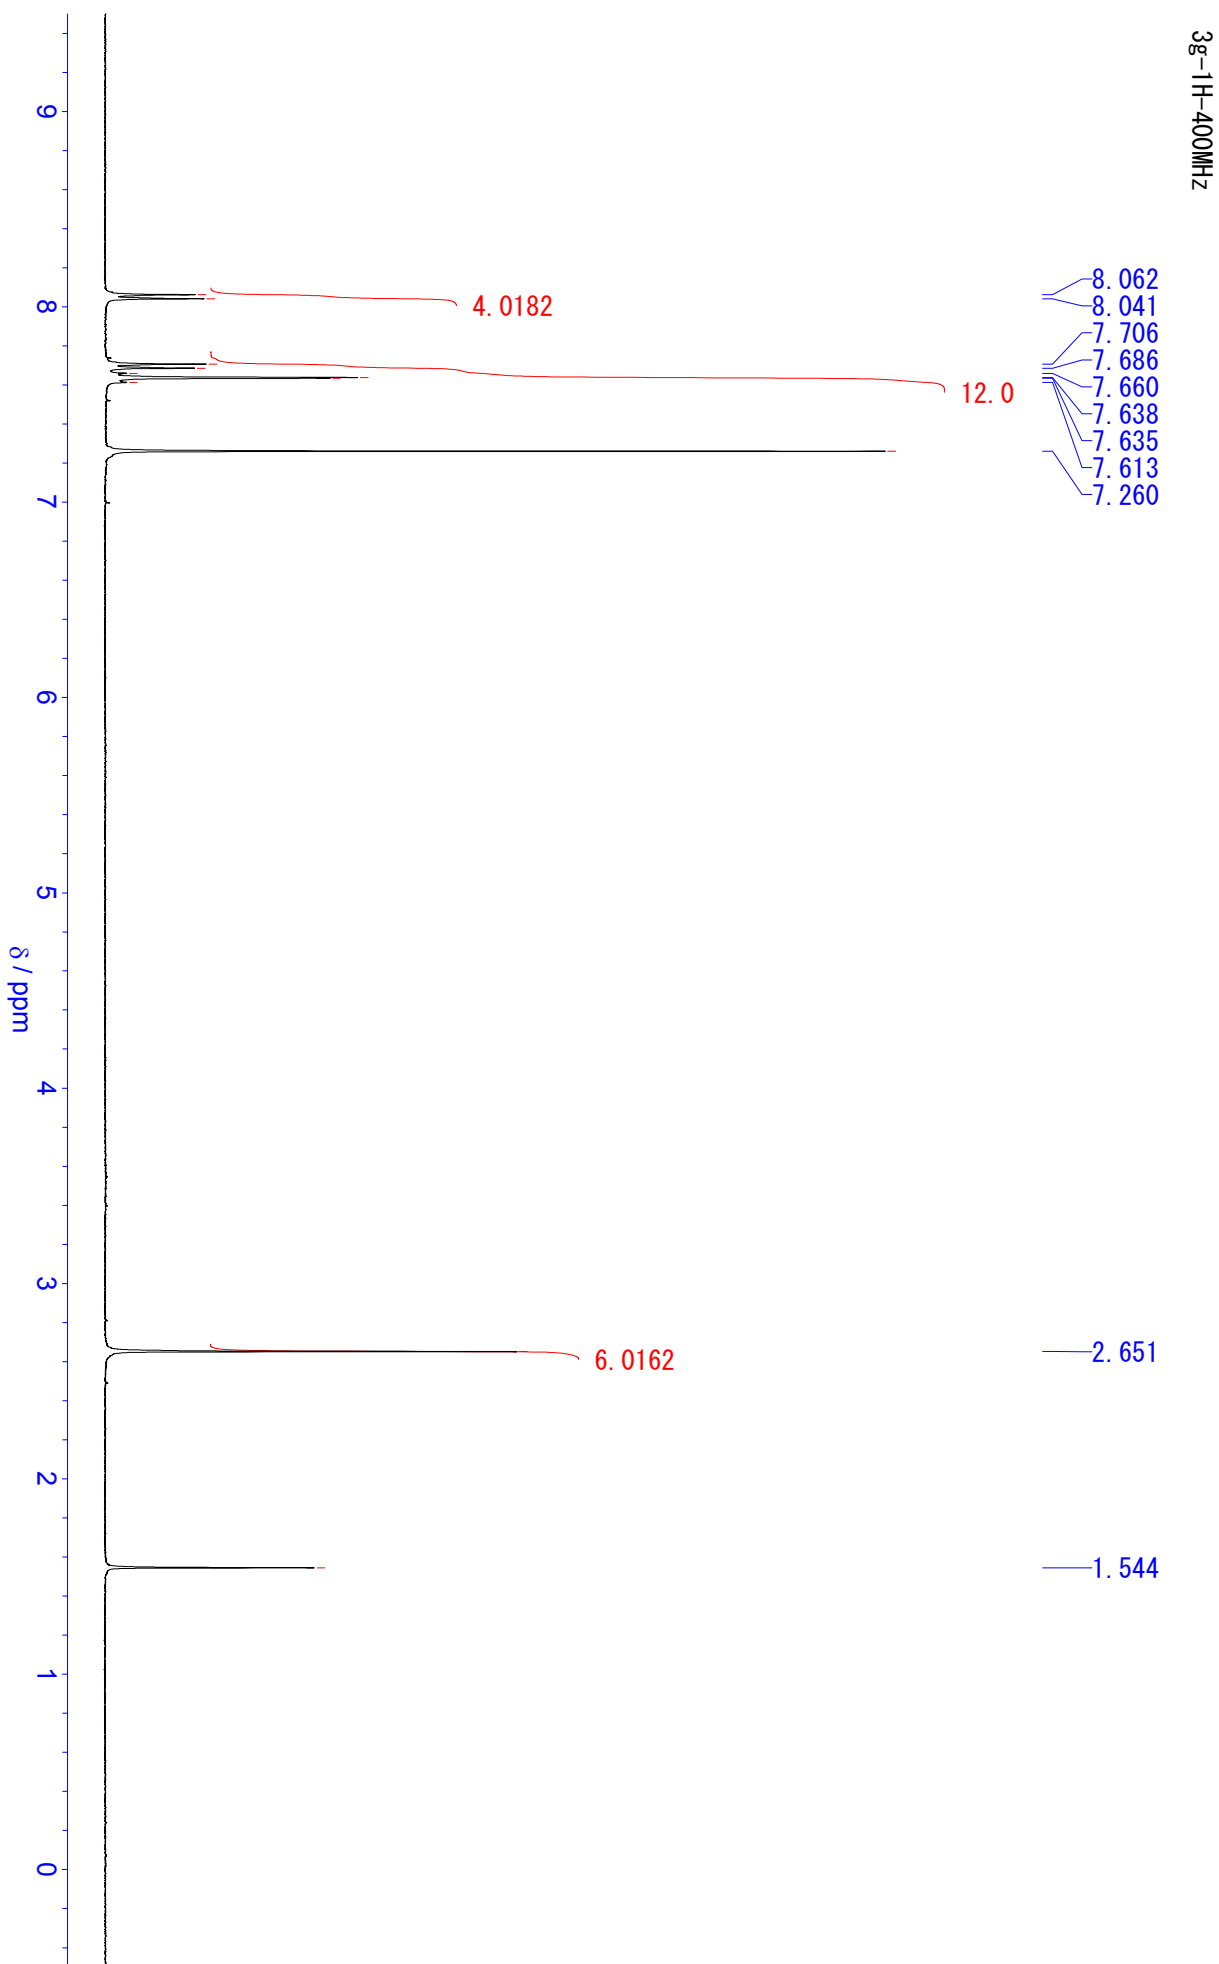

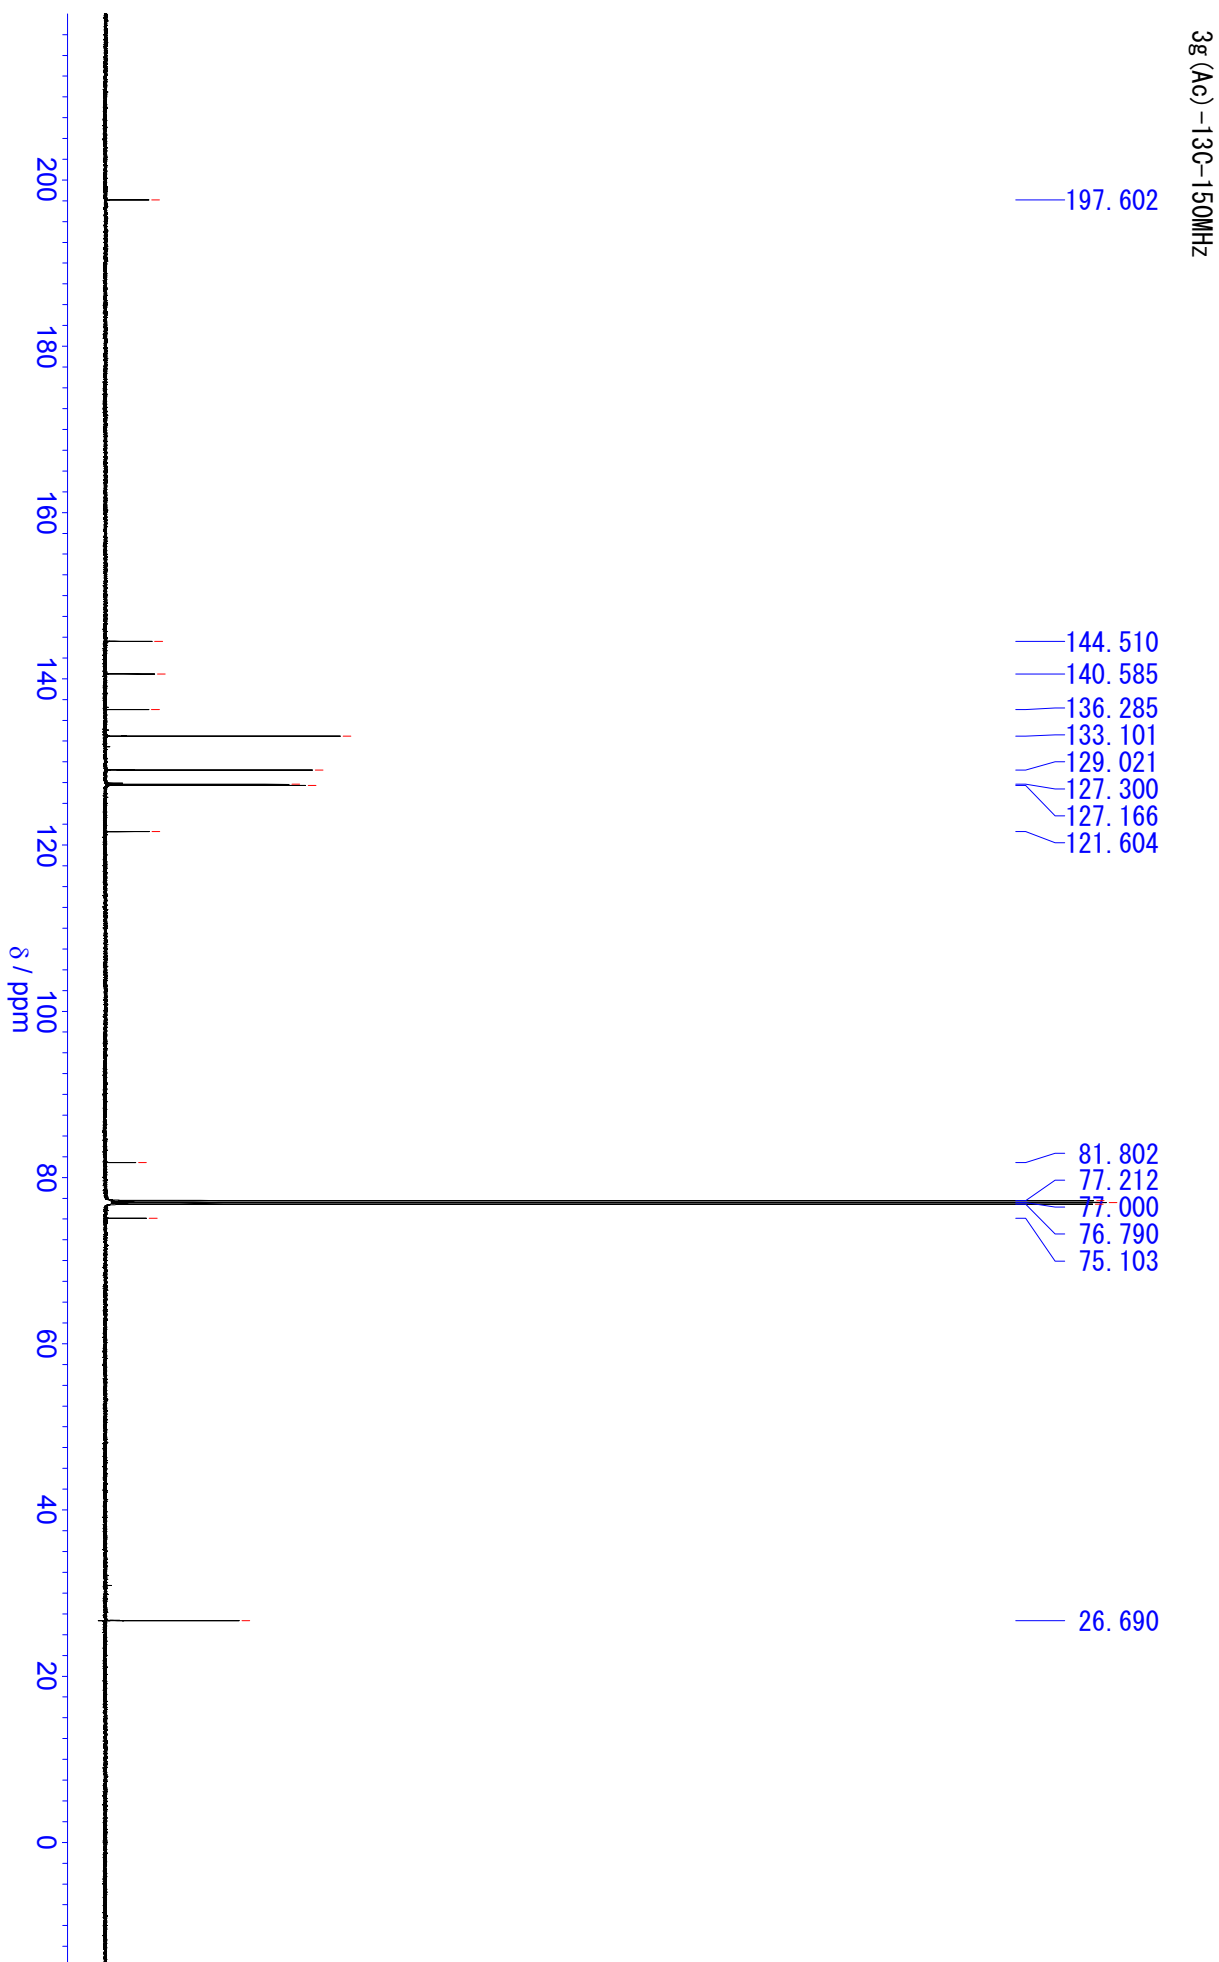

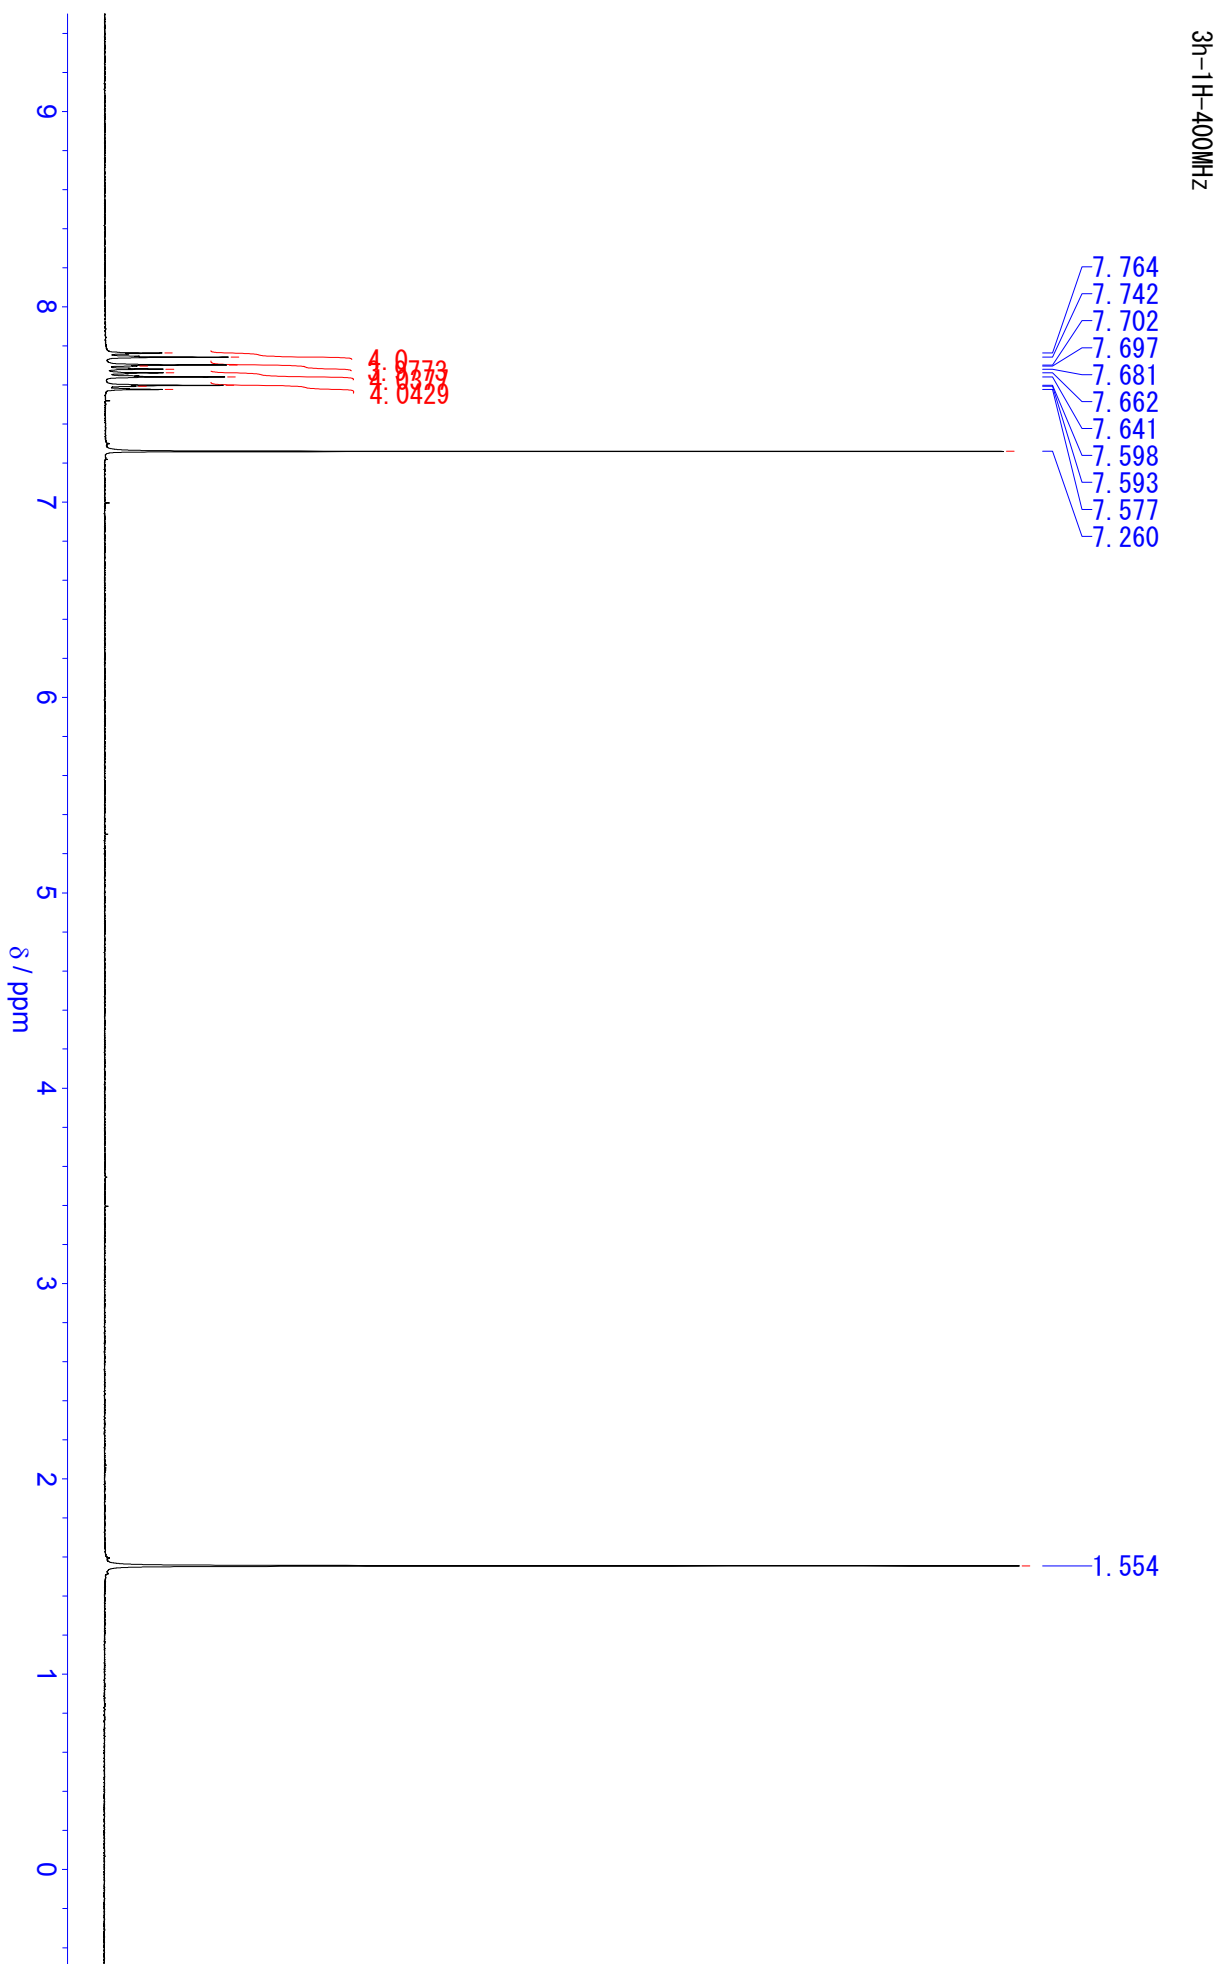

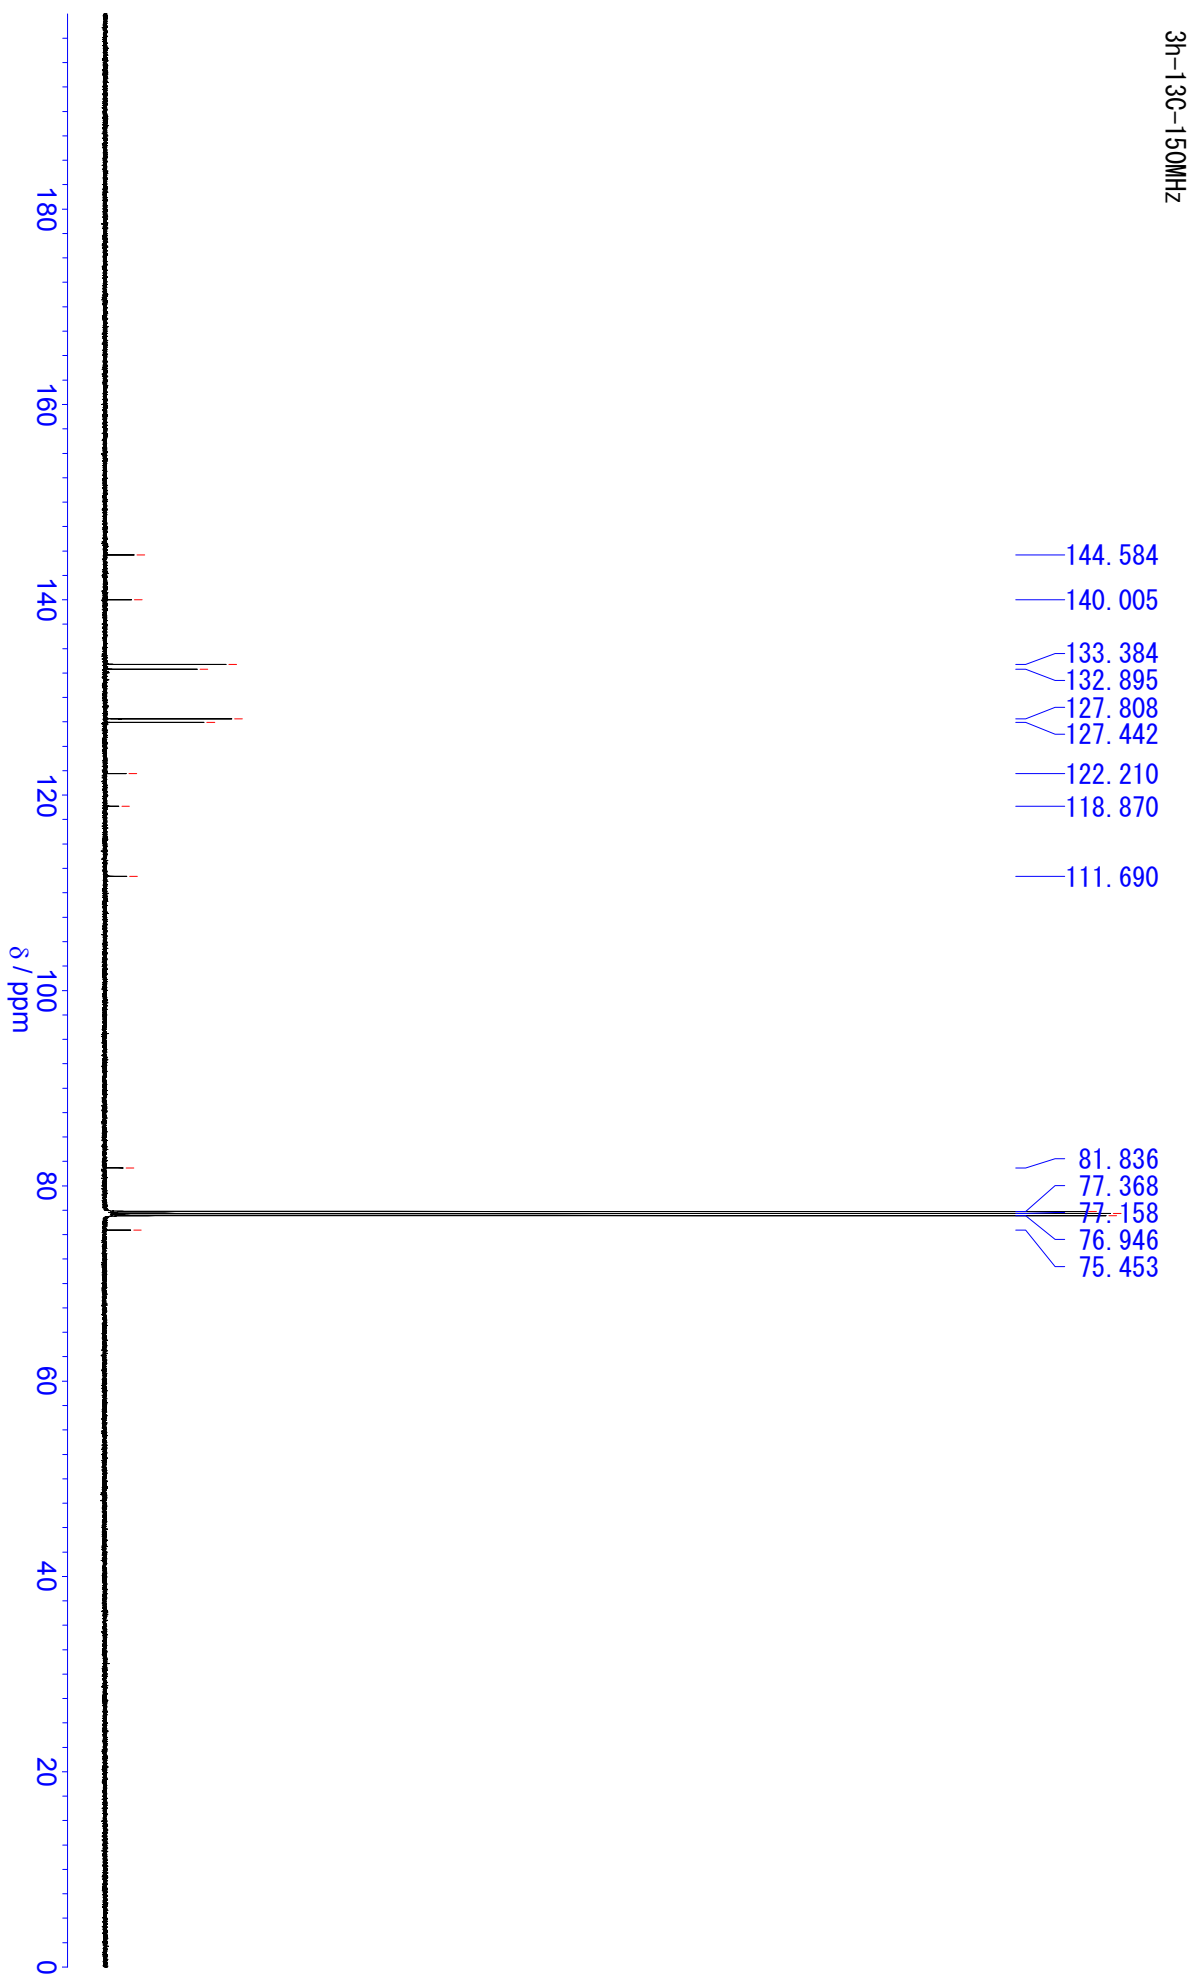

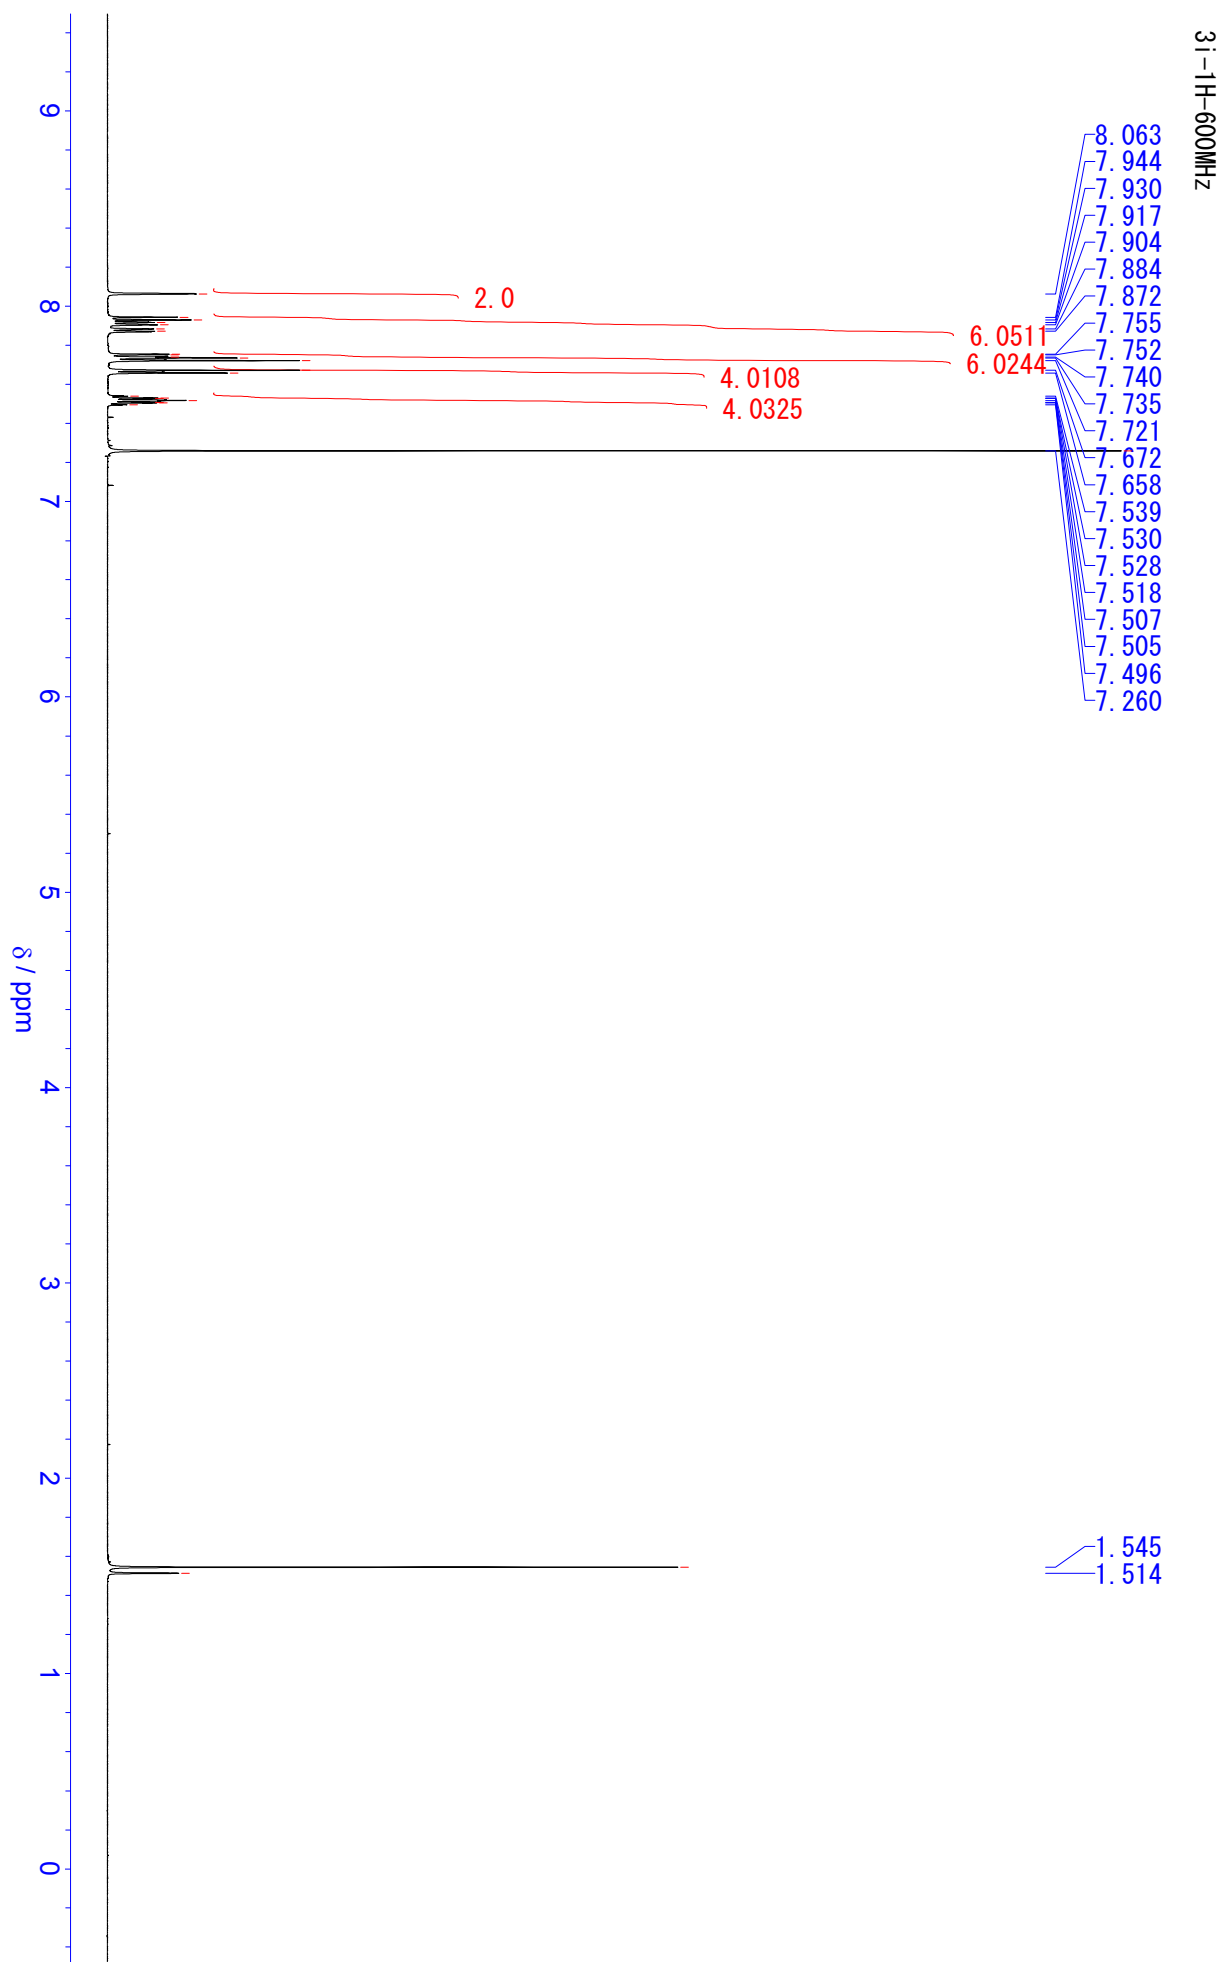

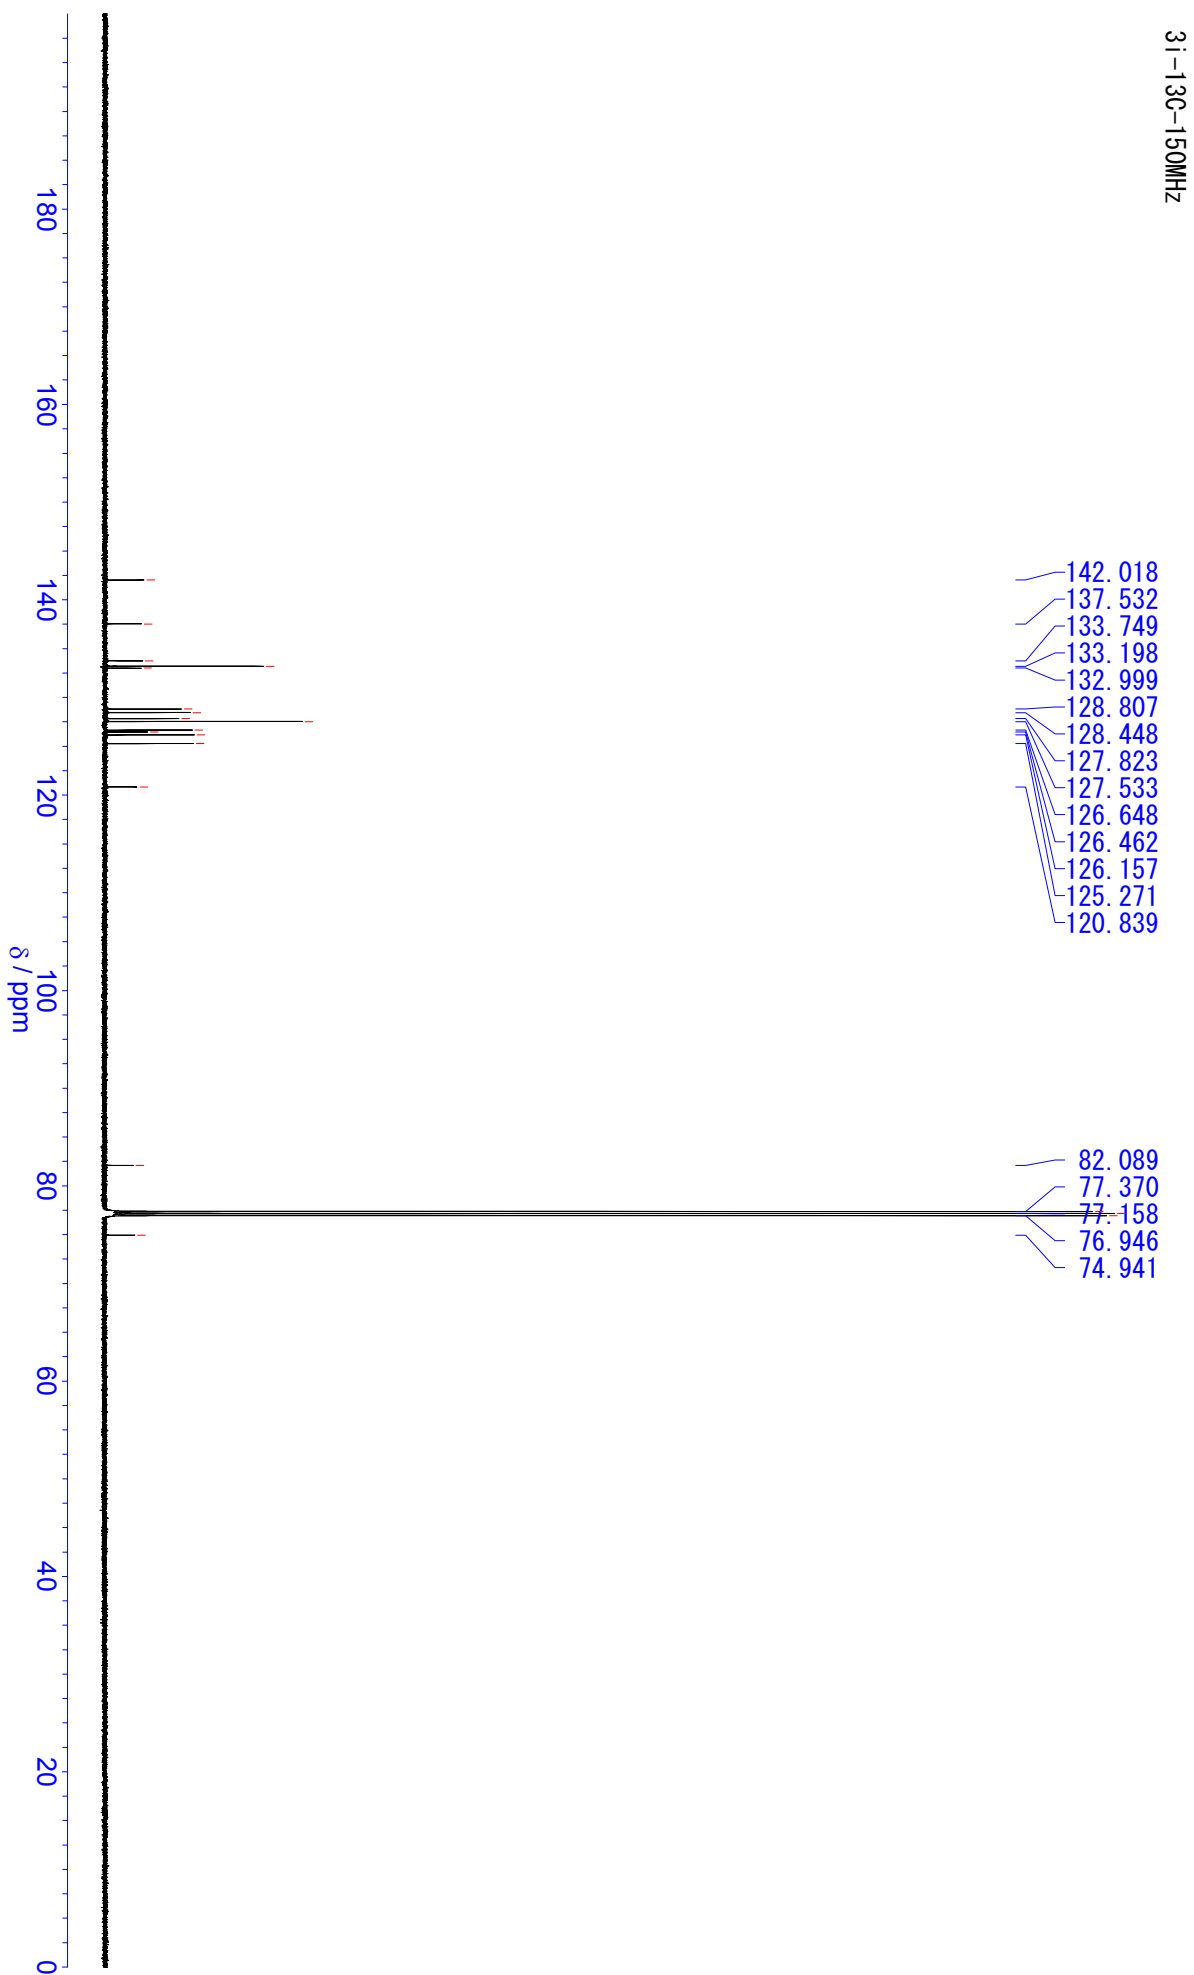

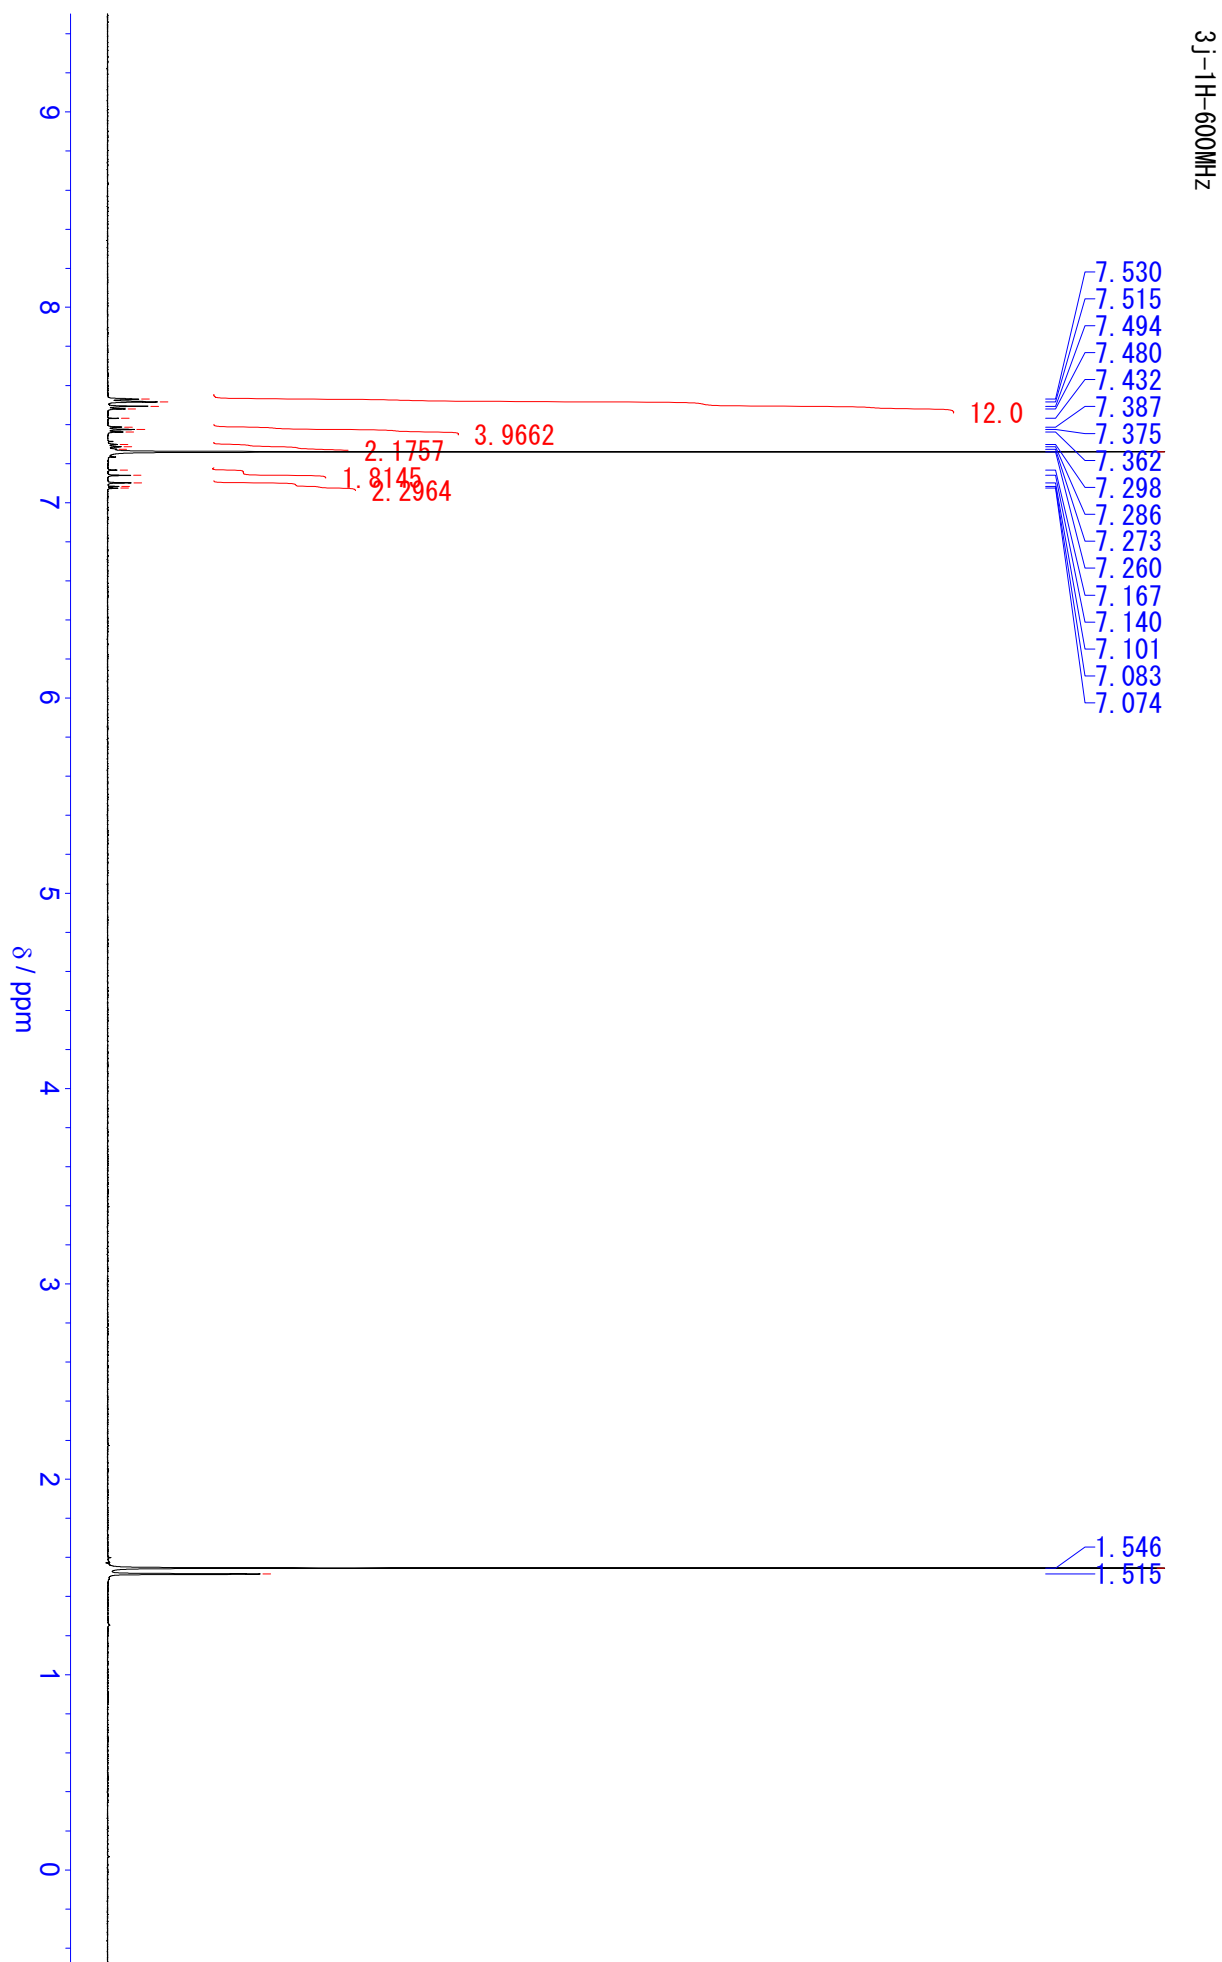

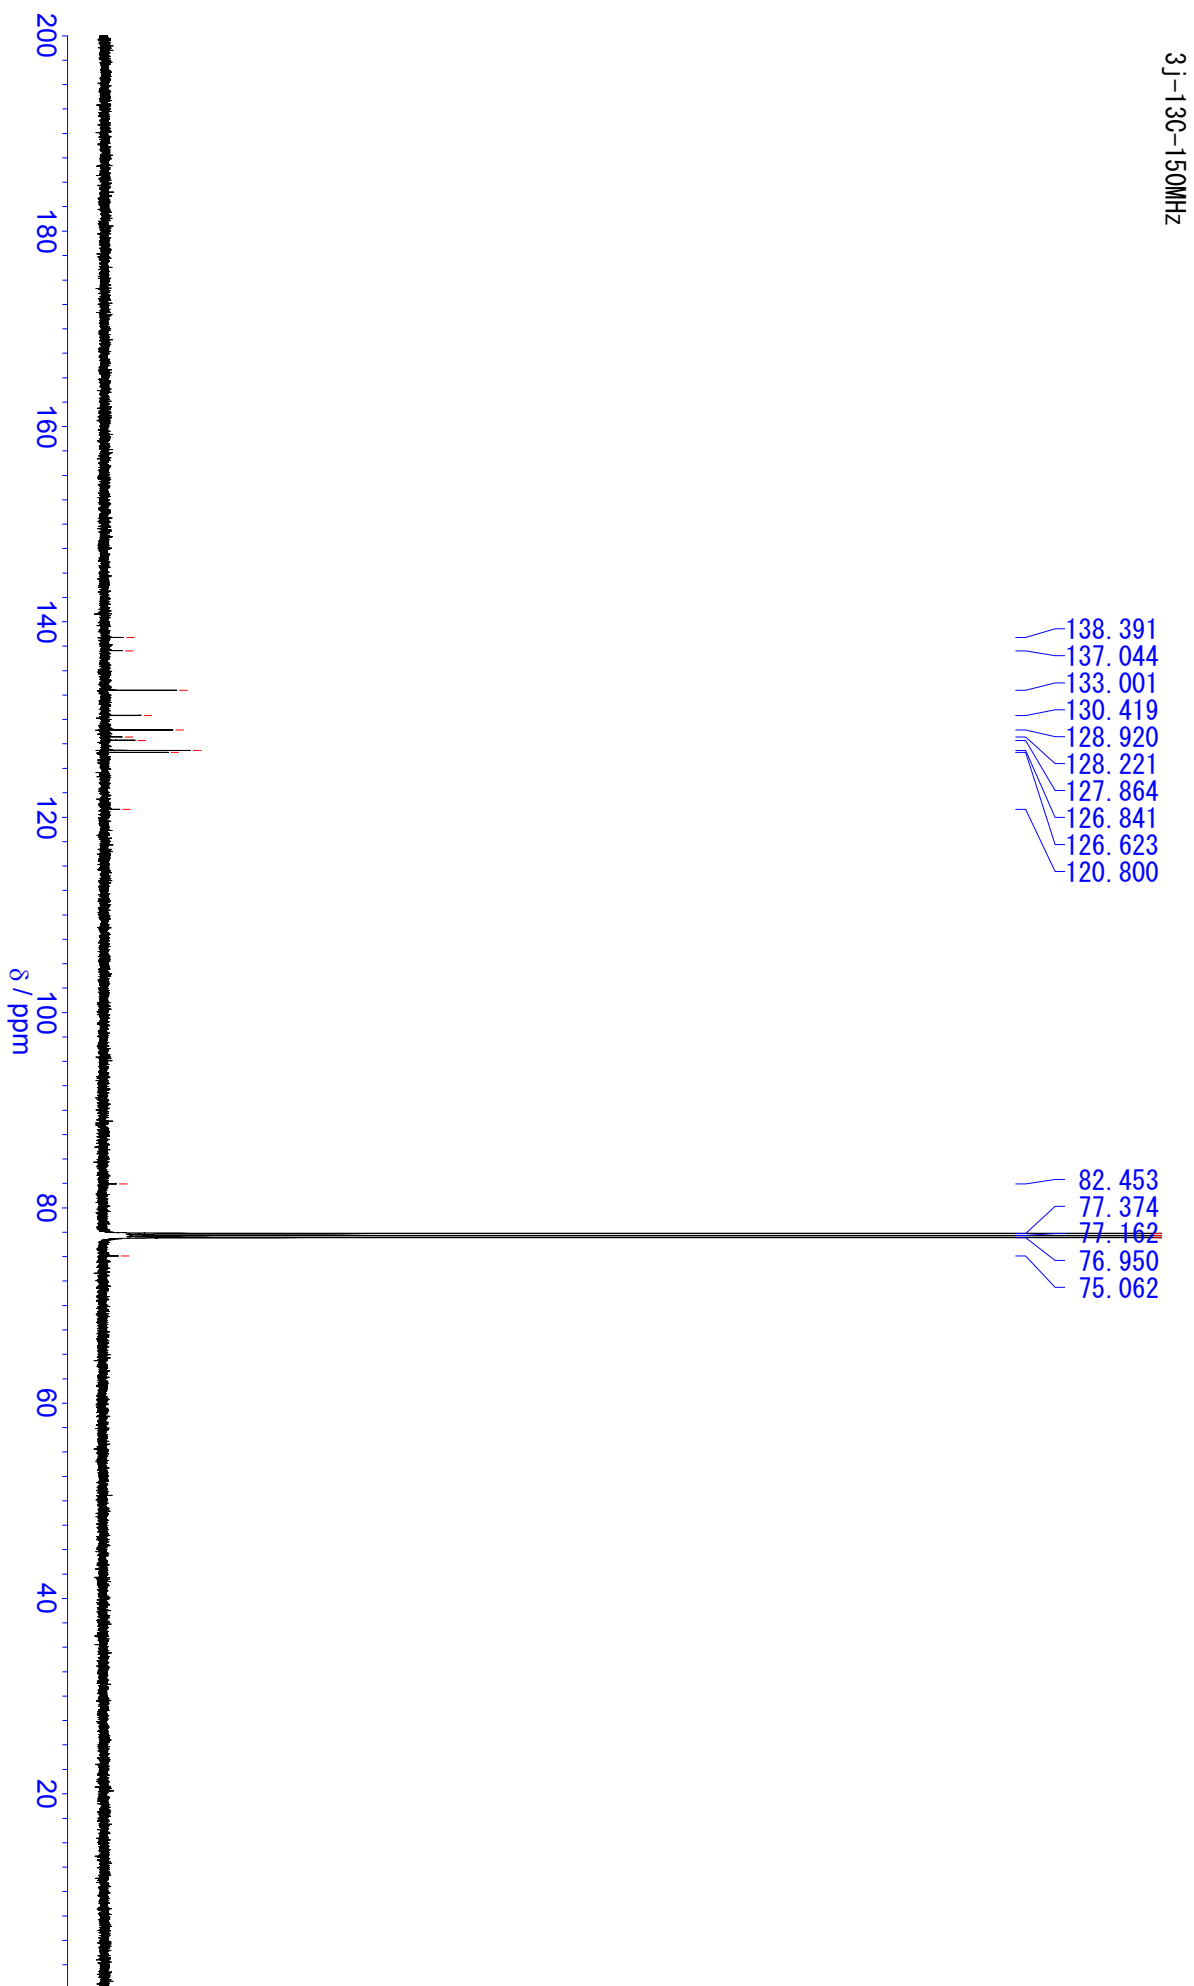



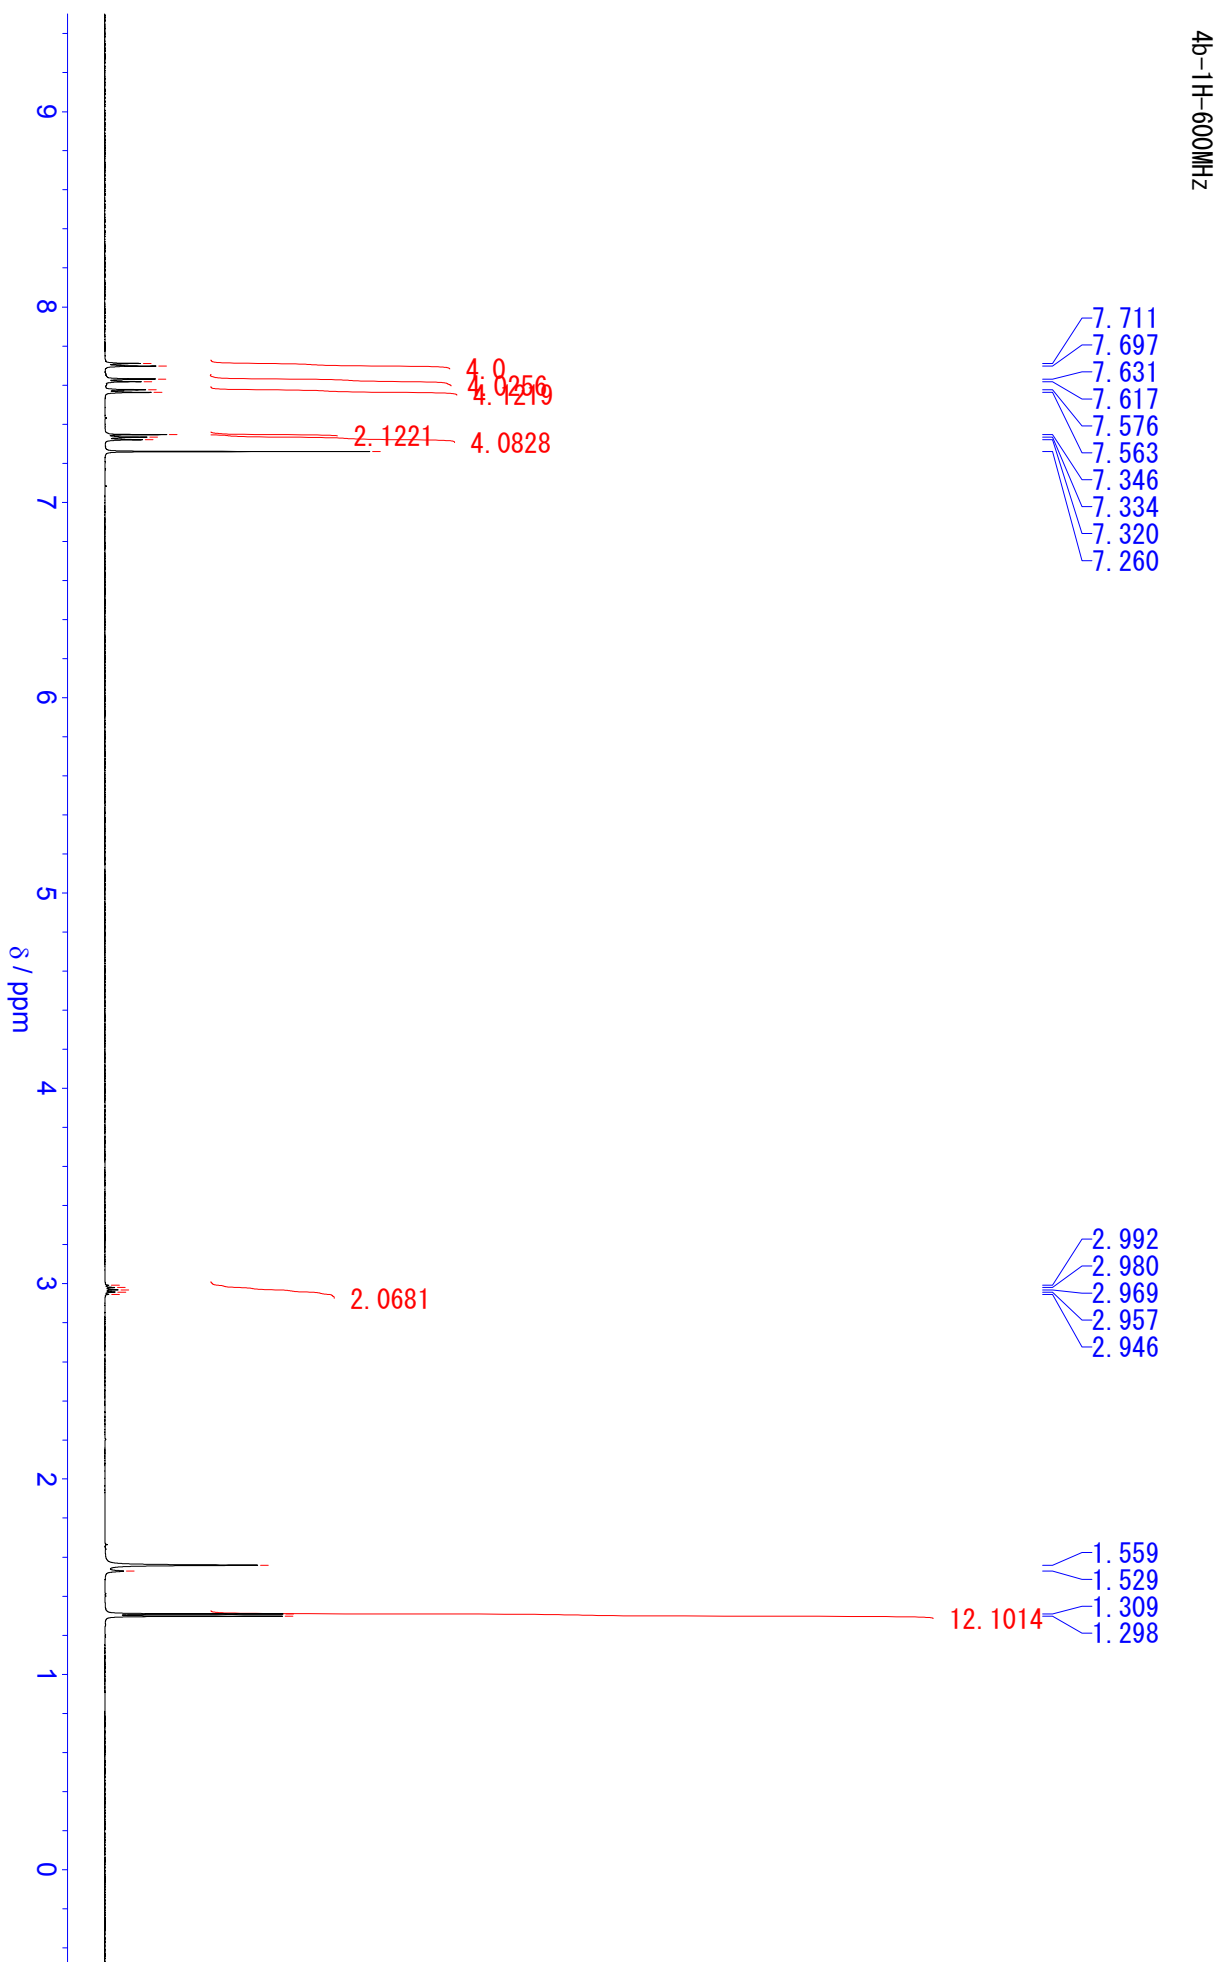

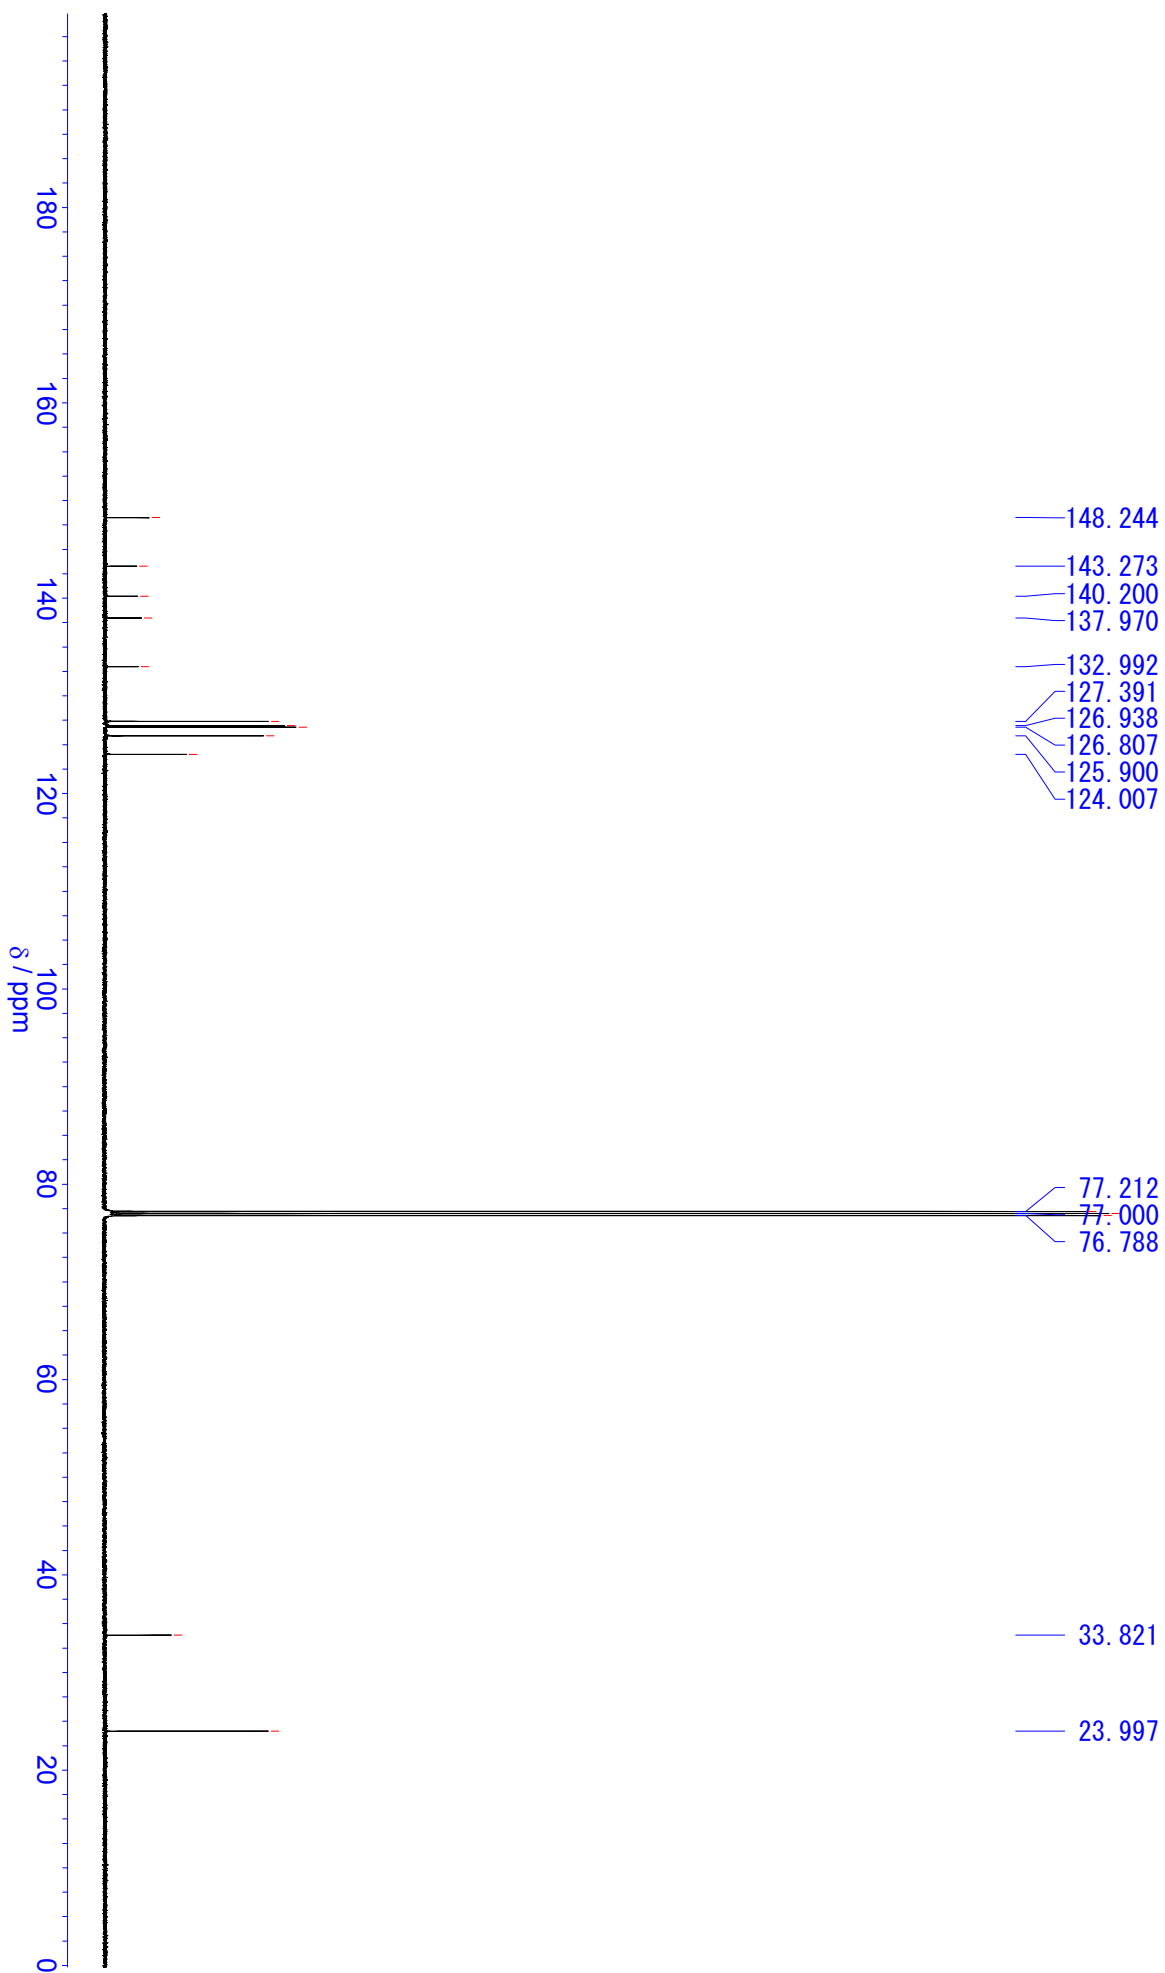

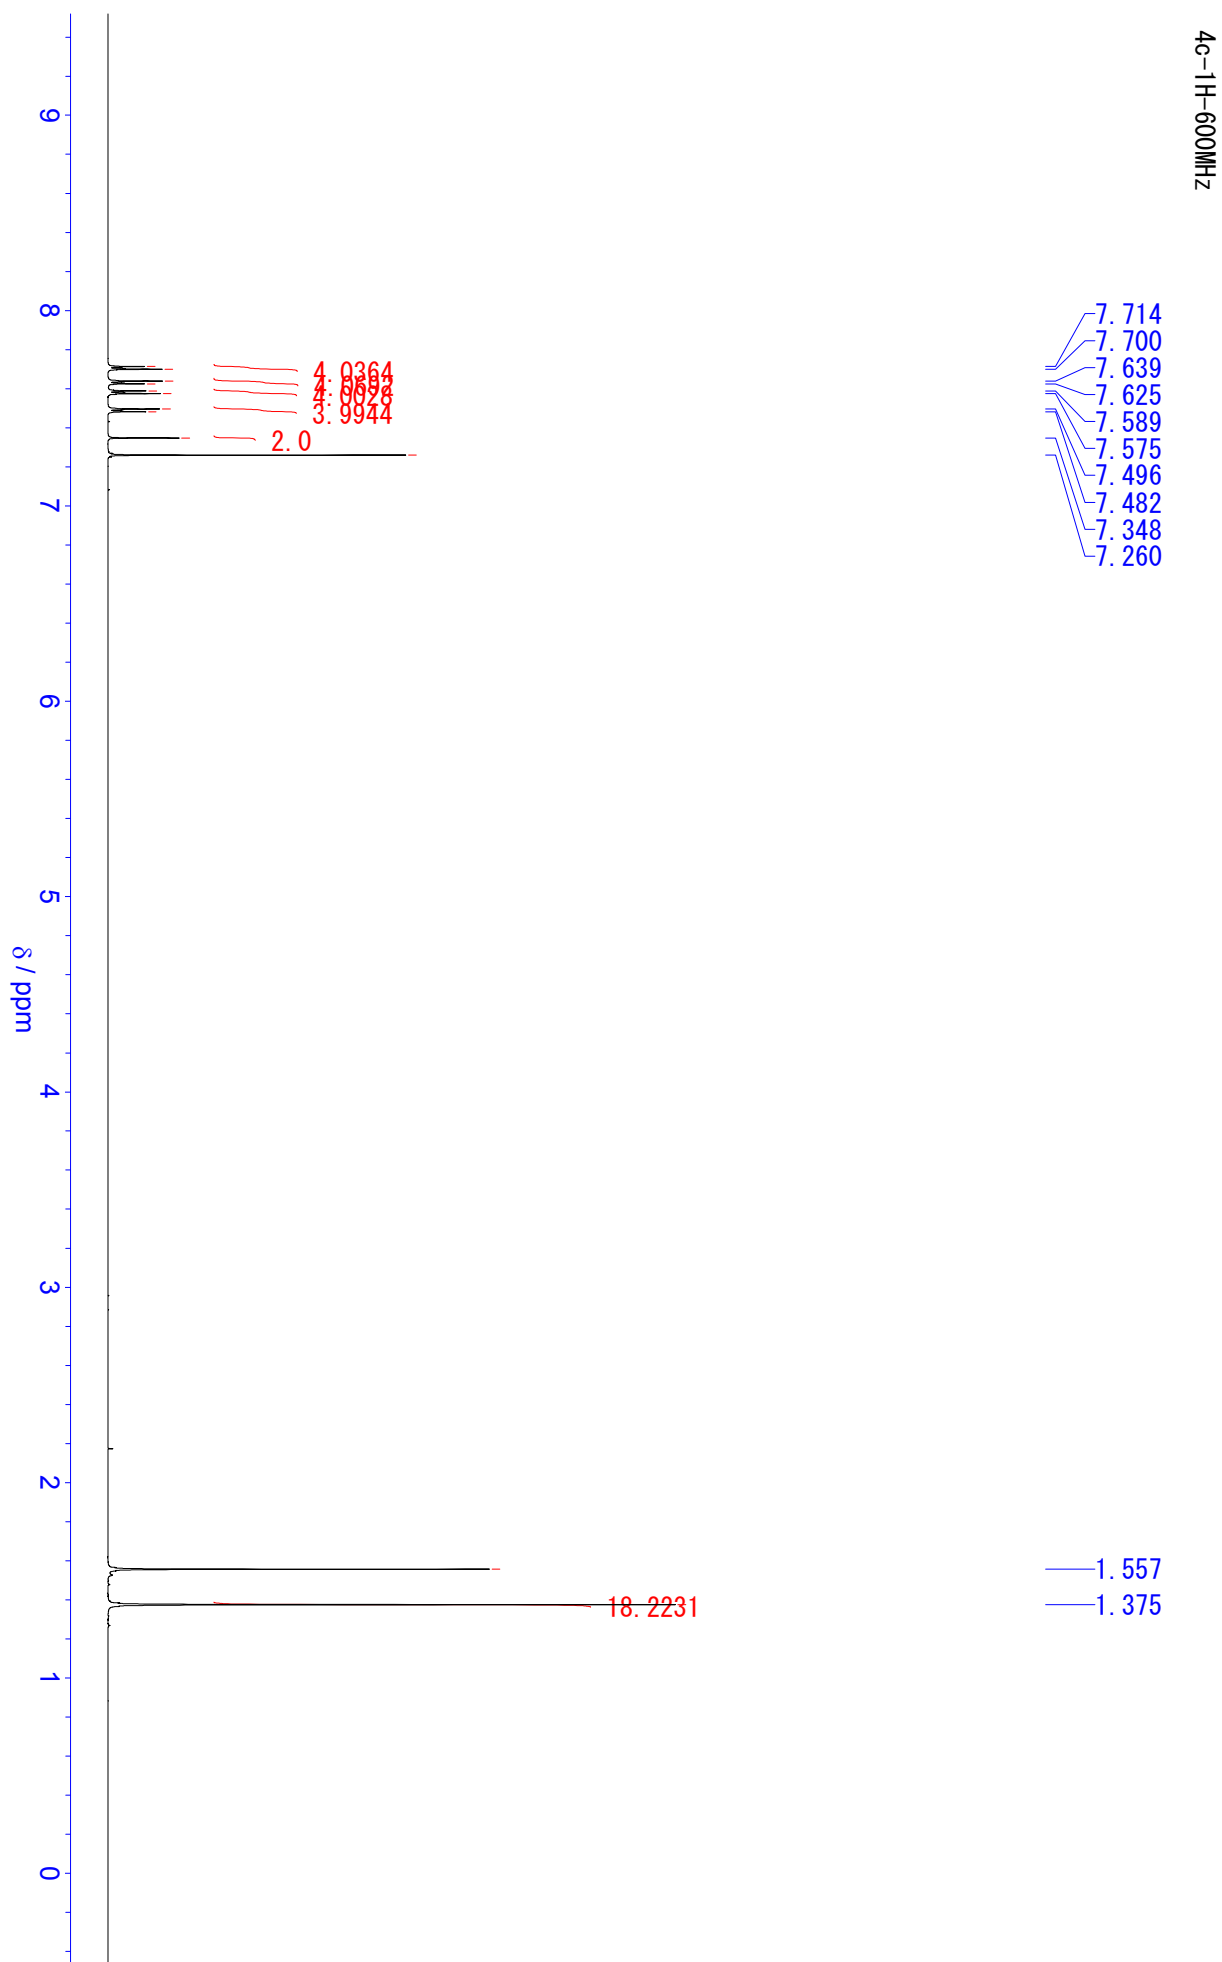

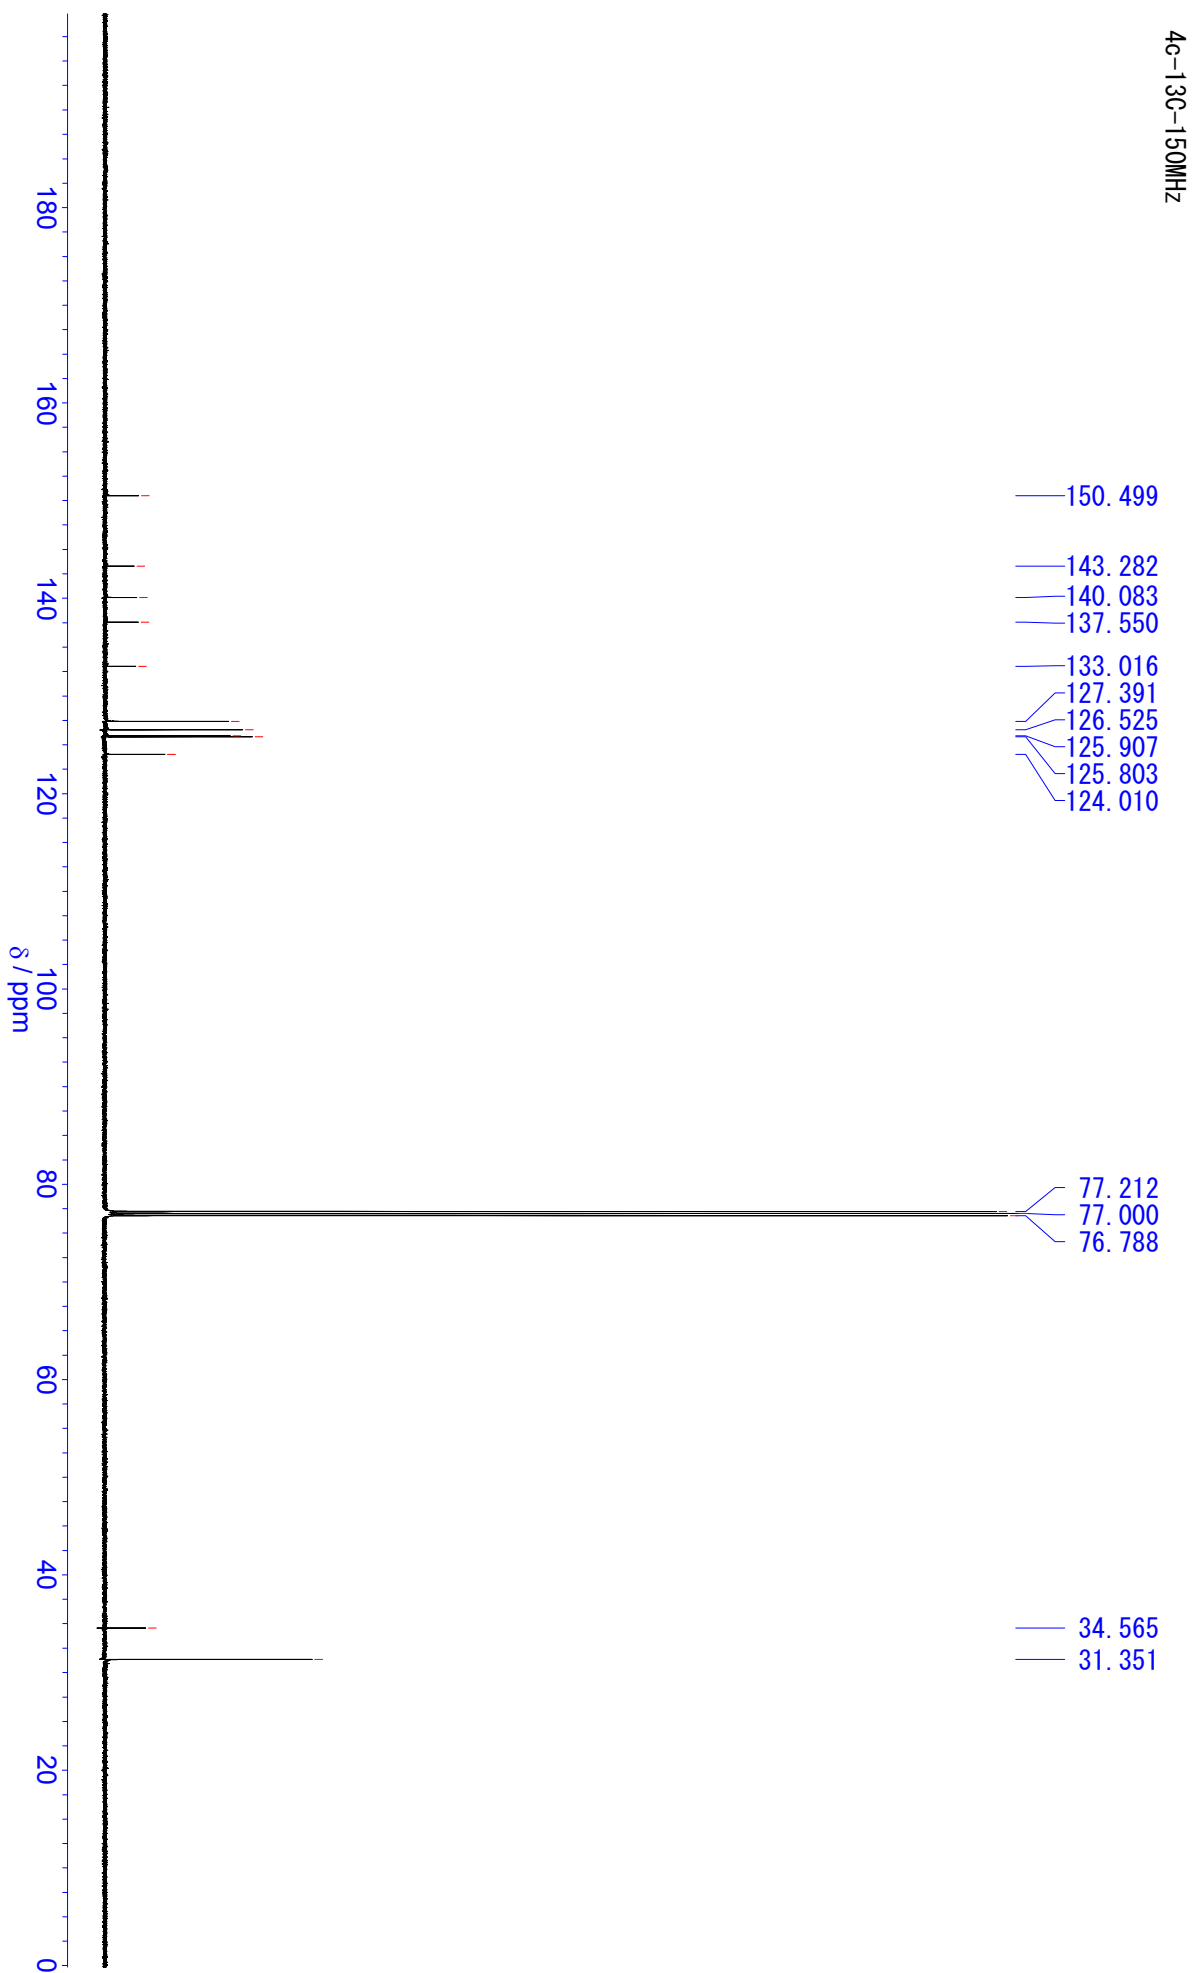

Supplement: c2ob26567b.pdf [file c2ob26567b.pdf]
